# Supplementary material for: Patients presenting to an acute general hospital with acute mental health needs: a retrospective observational cohort study
Source: PubMed Central journal article supplement — BMJ Open. 2022 Mar 29;12(3):e059102. doi: 10.1136/bmjopen-2021-059102 (PMC8969002; doi:10.1136/bmjopen-2021-059102), 2022-03-29
Supplement: bmjopen-2021-059102.draft_revisions.pdf [file bmjopen-2021-059102.draft_revisions.pdf]

# BMJ Open

BMJ Open is committed to open peer review. As part of this commitment we make the peer review history of every article we publish publicly available.

When an article is published we post the peer reviewers' comments and the authors' responses online. We also post the versions of the paper that were used during peer review. These are the versions that the peer review comments apply to.

The versions of the paper that follow are the versions that were submitted during the peer review process. They are not the versions of record or the final published versions. They should not be cited or distributed as the published version of this manuscript.

BMJ Open is an open access journal and the full, final, typeset and author-corrected version of record of the manuscript is available on our site with no access controls, subscription charges or pay-per-view fees (<http://bmjopen.bmj.com>).

If you have any questions on BMJ Open's open peer review process please email [info.bmjopen@bmj.com](mailto:info.bmjopen@bmj.com)

# BMJ Open

## Patients presenting to an acute general hospital with acute mental health needs. A retrospective observational cohort study.

|                               |                                                                                                                                                                                                                                                                                                                                                                                                                                                   |
|-------------------------------|---------------------------------------------------------------------------------------------------------------------------------------------------------------------------------------------------------------------------------------------------------------------------------------------------------------------------------------------------------------------------------------------------------------------------------------------------|
| Journal:                      | <i>BMJ Open</i>                                                                                                                                                                                                                                                                                                                                                                                                                                   |
| Manuscript ID                 | bmjopen-2021-059102                                                                                                                                                                                                                                                                                                                                                                                                                               |
| Article Type:                 | Original research                                                                                                                                                                                                                                                                                                                                                                                                                                 |
| Date Submitted by the Author: | 08-Nov-2021                                                                                                                                                                                                                                                                                                                                                                                                                                       |
| Complete List of Authors:     | Cann, Johnathon; Imperial College Healthcare NHS Trust, Trauma and Orthopaedics<br>Barter, Reece; Imperial College Healthcare NHS Trust, Trauma and Orthopaedics<br>Battle, Joseph; Imperial College Healthcare NHS Trust, Trauma and Orthopaedics<br>Schwenck, Jonas; Imperial College Healthcare NHS Trust, Trauma and Orthopaedics<br>Anakwe, Raymond; Imperial College Healthcare NHS Trust, Trauma and Orthopaedics; Imperial College London |
| Keywords:                     | MENTAL HEALTH, COVID-19, Health policy < HEALTH SERVICES ADMINISTRATION & MANAGEMENT, ACCIDENT & EMERGENCY MEDICINE                                                                                                                                                                                                                                                                                                                               |
|                               |                                                                                                                                                                                                                                                                                                                                                                                                                                                   |

SCHOLARONE™  
Manuscripts

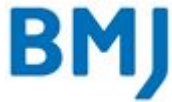

I, the Submitting Author has the right to grant and does grant on behalf of all authors of the Work (as defined in the below author licence), an exclusive licence and/or a non-exclusive licence for contributions from authors who are: i) UK Crown employees; ii) where BMJ has agreed a CC-BY licence shall apply, and/or iii) in accordance with the terms applicable for US Federal Government officers or employees acting as part of their official duties; on a worldwide, perpetual, irrevocable, royalty-free basis to BMJ Publishing Group Ltd ("BMJ") its licensees and where the relevant Journal is co-owned by BMJ to the co-owners of the Journal, to publish the Work in this journal and any other BMJ products and to exploit all rights, as set out in our [licence](#).

The Submitting Author accepts and understands that any supply made under these terms is made by BMJ to the Submitting Author unless you are acting as an employee on behalf of your employer or a postgraduate student of an affiliated institution which is paying any applicable article publishing charge ("APC") for Open Access articles. Where the Submitting Author wishes to make the Work available on an Open Access basis (and intends to pay the relevant APC), the terms of reuse of such Open Access shall be governed by a Creative Commons licence – details of these licences and which [Creative Commons](#) licence will apply to this Work are set out in our licence referred to above.

Other than as permitted in any relevant BMJ Author's Self Archiving Policies, I confirm this Work has not been accepted for publication elsewhere, is not being considered for publication elsewhere and does not duplicate material already published. I confirm all authors consent to publication of this Work and authorise the granting of this licence.

1  
2  
3  
4 1 **Patients presenting to an acute general hospital with acute mental health**  
5 2 **needs. A retrospective observational cohort study.**  
6 3

7 4 Full name: **Johnathon Cann**

8 5 Department: Trauma & Orthopaedics

9 6 Institution: Imperial College Healthcare NHS Trust

10 7 City: London

11 8 Country: UK

12 9  
13 10 Full name: **Reece Barter**

14 11 Department: Trauma & Orthopaedics

15 12 Institution: Imperial College Healthcare NHS Trust

16 13 City: London

17 14 Country: UK

18 15  
19 16 Full name: **Joseph Battle**

20 17 Department: Trauma & Orthopaedics

21 18 Institution: Imperial College Healthcare NHS Trust

22 19 City: London

23 20 Country: UK

24 21  
25 22 Full name: **Jonas Schwenck**

26 23 Department: Trauma & Orthopaedics

27 24 Institution: Imperial College Healthcare NHS Trust

28 25 City: London

29 26 Country: UK

30 27  
31 28 Full name: **Raymond E Anakwe** (Corresponding author)

32 29 Department: Trauma & Orthopaedics

33 30 Institution:1. Imperial College Healthcare NHS Trust. London

34 31 2. Imperial College, London

35 32  
36 33 St Mary's Hospital

37 34 Imperial College Healthcare NHS Trust

38 35 Praed Street

39 36 London

40 37 W2 1NY

41 38 Email: raymond.anakwe@nhs.net

42 39  
43 40 Word count: 2055

44 41

45 42

46 43

## 44 **ABSTRACT**

### 45 **Objectives**

46 To examine the numbers and patterns of patients presenting to an urban acute general hospital with  
47 acute mental health presentations and to further investigate any variation related to the covid  
48 pandemic.

### 50 **Design**

51 Retrospective observational cohort study.

### 53 **Setting**

54 An urban acute general hospital in London, United Kingdom, comprising of five sites and two emergency  
55 departments. The hospital provides tertiary level general acute care but is not an acute mental health  
56 services provider. There is an inpatient liaison psychiatry service

### 58 **Participants**

59 358131 patients attended the emergency departments of our acute general hospital during the study  
60 period. Of these, 14871 patients attended with an acute mental health presentation. A further 14947  
61 patients attending with a physical illness were also noted to have a concurrent recorded mental health  
62 diagnosis.

### 64 **Results**

65 Large numbers of patients present to our acute general hospital with mental health illness even though  
66 the organisation does not provide mental health services other than inpatient liaison psychiatry. There  
67 was some variation in the numbers and patterns of presentations related to the Covid-19 pandemic.

1  
2  
3 68 Patient numbers reduced to a mean of 9.13 (SD 3.38) patients presenting per day during the first  
4  
5 69 'lockdown' compared with 10.75 (SD 1.96) patients per day in an earlier matched time period ( $t=3.80$ ,  
6  
7 70  $p<0.01$ ). Acute mental health presentations following the third lockdown increased to a mean of 13.84 a  
8  
9 71 day.  
10  
11  
12 72

### 13 14 73 **Conclusions**

15  
16 74 Large numbers of patients present to our acute general hospital with mental health illness. This suggests  
17  
18 75 a need for appropriate resource, staffing and training to address the needs of these patients in a non-  
19  
20 76 mental health provider organisation and subsequent appropriate transfer for timely treatment . The  
21  
22 77 Covid-19 pandemic and the resulting lockdowns have resulted in variation in the numbers and patterns  
23  
24 78 of patients presenting with acute mental health illness but these presentations are not new.  
25  
26 79 Considerable work is still needed to provide integrated care which addresses the physical and mental  
27  
28 80 healthcare needs of patients presenting to acute and general hospitals  
29  
30  
31

### 32 81 33 34 82 **Strengths and limitations of this study**

- 35  
36  
37 83
- 38 • This is a retrospective study.
  - 39 84 • Lockdown and inter-lockdowns were compared with pre-covid-19 matched time periods.
  - 40 85 • A large and reliable data set strengthens this study however diagnostic coding is open to error  
41  
42 86 and interpretation.
  - 43 87 • This study cannot capture the interactions and presentations occurring in the community with  
44  
45 88 primary care teams where it is expected that large numbers of patients will also present.
  - 46 89 • There is implicit risk in using routinely collected data to evaluate a research question where the  
47  
48 90 data may not have been collected for this specific purpose  
49  
50  
51  
52  
53  
54

55 91  
56  
57  
58  
59  
60

## 92 KEY WORDS

93 Mental health, Covid-19, lockdown, emergency department, acute general hospital

## 95 INTRODUCTION

96  
97 There is significant overlap in the mental and physical health needs for patients and for some time it has  
98 been an aspiration to offer integrated care. The National Confidential Enquiry into Patient Outcome and  
99 Death (NCEPOD) investigated and reported on the mental health needs of patients treated in acute  
100 general hospitals for physical illnesses in 2017 and made several recommendations.[1] Key among these  
101 were that all hospital staff who have interaction with patients, including clinical, clerical and security  
102 staff, should receive training in mental health conditions in general hospitals. Training should be  
103 developed and offered across the entire career pathway from undergraduate to workplace based  
104 continued professional development. The report also recommended that in order to overcome the  
105 divide between mental and physical healthcare, liaison psychiatry services should be fully integrated  
106 into general hospitals. The structure and staffing of the liaison psychiatry service should be based on the  
107 clinical demand both within working hours and out-of-hours so that they can participate as part of the  
108 multidisciplinary team. These recommendations have only been adopted in part in many places and still  
109 represent a challenge several years later.

110  
111 The delivery of truly integrated assessment and care for patients presenting to acute general hospitals  
112 where mental health services are not normally provided requires careful planning and an understanding  
113 of the numbers and types of patients presenting. This is so that an assessment can be made as to what is  
114 required to meet their needs and to provide high-quality care and patient experience.

115

1  
2  
3 116 We undertook this study to examine the numbers and patterns of patients presenting to an urban acute  
4  
5 117 general hospital with acute mental health presentations via the emergency department. This hospital  
6  
7 118 does not provide any routine mental health services other than an inpatient liaison psychiatry service.  
8  
9  
10 119 We hypothesised that our study would confirm a large number of patients presenting with acute  
11  
12 120 episodes of mental health conditions despite the fact that the hospital does not provide mental health  
13  
14 121 services. We further hypothesised that our study would demonstrate increasing numbers of patients  
15  
16 122 presenting in this way over time and that this might be representative of the situation more generally  
17  
18  
19 123 and beyond our organisation.  
20

21 124  
22  
23 125 The period of our study included the first waves of the global covid-19 pandemic and so we also  
24  
25 126 examined whether there was any effect on the patterns and numbers of patient presentations as a  
26  
27 127 result of the pandemic and the social restrictions associated with the mandated periods of social  
28  
29 128 lockdown where normal mixing and social interaction were severely restricted. We hypothesised that  
30  
31 129 the periods of the social lockdown would result in increasing numbers of patients presenting via the  
32  
33 130 emergency department with acute mental health needs.  
34  
35

36 131

37 132

38 133

39 134

40 135

41 136

42 137

43 138

44 139



## 140 **METHODS**

141

### 142 **Data and setting**

143 We conducted a retrospective observational cohort study of all patients presenting to an urban acute  
144 general hospital with an acute mental health illness presentation. Our hospital organisation is made up  
145 of 5 hospital sites served by 2 acute emergency departments. Presentations to both emergency  
146 departments were included. All hospital attendances, admissions and treatments are recorded and  
147 coded to form data for Hospital Episode Statistics (HES) and are also recorded in the electronic patient  
148 record (EPR).

149

150 We used the United Kingdom government website to confirm the dates of mandated social lockdown (L)  
151 periods.[2] We included the 3 periods of national lockdown in the United Kingdom which occurred  
152 during the study period.

153

154 Lockdown 1 (L1) was defined between 23 March 2020 and 15 June 2020. Lockdown 2 (L2) was defined  
155 between 5 November 2020 and 2 December 2020. Lockdown 3 (L3) was defined between 6 January  
156 2021 and 12 April 2021. For analysis and comparison, we defined the periods between the statutory  
157 periods of lockdown to be 'inter-lockdown' (IL) periods. Inter-lockdown 1 (IL1) was therefore defined  
158 between 16 June 2020 and 4 November 2020. Inter-lockdown 2 (IL2) was defined between 3 December  
159 2020 and 5 January 2021. Inter-lockdown 3 (IL3) was defined between 13 April 2021 and 30 June 2021,  
160 when the study period ended after the final national lockdown.

161

162 Numbers and patterns of presentation were examined longitudinally to identify trends. We also  
163 examined and compared data for lockdown (L) and inter-lockdown (IL) periods with matched time

1  
2  
3 164 periods (MTP) between March 2018 and June 2019 in order to examine for any effects related to the  
4  
5 165 covid-19 pandemic.  
6

7 166

### 8 167 **Patients**

9  
10 168 We included all adult patients aged 18 years and older. We examined the hospital coding records and  
11  
12 169 electronic patient records for all adult patients attending our emergency departments with an acute  
13  
14 170 mental health presentation between 1 January 2018 and 30 June 2021. HES data and patient records  
15  
16 171 were examined to collate demographic information, diagnosis, details of initial referral and treatment,  
17  
18 172 waiting times and admission.  
19  
20

21 173

### 22 174 **Statistical analysis**

23  
24  
25 175 We analysed data using SPSS Statistics version 26.0. We present data as means with standard deviations  
26  
27 176 or median values with interquartile ranges. We used the standard t-test, Chi-squared tests, and ANOVA  
28  
29 177 with post-hoc Tukey test to compare categorical and continuous data between matched time periods.  
30  
31

32 178

### 33 179 **Patient and public involvement**

34  
35 180 Patients and the public were not involved in framing or designing this research question. As it is a  
36  
37 181 retrospective cohort study there was no patient impact. We did ask strategic lay forum members at our  
38  
39 182 hospital to read and comment on our manuscript.  
40  
41

42 183

43 184

44 185

45 186

46 187

## 188 RESULTS

189

### 190 Numbers of patients

191 358131 patients attended our emergency departments between 1 January 2018 and 30 June 2021. Of  
192 these, 14871 patients (4.2%) presented to our emergency departments with an acute mental health  
193 diagnosis (fig 1). In addition, 14947 patients (4.2%) who presented with a physical complaint also had a  
194 concurrent recorded mental health diagnosis.

195

### 196 Presentations

197 The numbers of patients presenting during the covid-19 pandemic varied considerably. The numbers of  
198 patients presenting with acute mental health illness was at the lowest level during the first lockdown  
199 (L1) period (fig 2). When compared with a matched time period (MTP) in 2018, 761 patients presented  
200 acutely in L1 compared with 897 patients in MTP1 (figs 2 and 3). This represents a mean of 9.13 (SD  
201 3.38) patients presenting per day during L1 compared with 10.75 (SD 1.96) patients per day during MTP1  
202 ( $t=3.80$ ,  $p<0.01$ ).

203

204 Following the first lockdown there was a significant increase in acute mental health presentations during  
205 IL1 compared with a MTP in 2018 ( $t=-5.34$ ,  $p<0.01$ ). There was a similar increase in acute mental health  
206 presentations following the third lockdown in IL3, with a mean 13.84 acute mental health presentations  
207 per day which was significantly greater than the number of attendances for the MTP in 2019 ( $t=-10.79$ ,  
208  $p<0.01$ )

209

210

211

## 212 **Age**

213 The mean age of patients presenting to the department was 38.57 years (n= 14871, SD= 15.041). There  
214 was no significant difference in the age of presentation when different time periods were compared.  
215 (ANOVA,  $f=2.0357$ ,  $p=0.0574$ ).

## 217 **Diagnoses and patterns of illness**

218 There was variation in the pattern of mental health illness presenting to our emergency departments  
219 (fig 4). We noted a significant increase ( $t=-13.62$ ,  $p<0.01$ ) in patients presenting with psychosis in L1.  
220 There were a mean 2.11 (SD 0.85) presentations of psychosis per day during L1 compared with a mean  
221 0.77 (SD 0.30) of such presentations during the respective MTP. In contrast, we saw a significant  
222 decrease in presenting rates of self-harm ( $t=-2.45$ ,  $p=0.02$ ) and substance misuse ( $t=6.28$ ,  $p<0.01$ ) per  
223 day in L1 when compared to the MTP.

225 IL1 saw an increase in patients presenting with acute psychosis ( $t=-8.56$ ,  $p<0.01$ ), anxiety ( $t=-4.41$ ,  
226  $p<0.01$ ), overdose ( $t=-11.7$ ,  $p<0.01$ ), and suicidal presentations ( $t=-7.34$ ,  $p<0.01$ ), compared to the  
227 respective MTP, whilst substance misuse presentations decreased ( $t=2.56$ ,  $p=0.01$ ). In L2 we recorded a  
228 continuing increase in patients attending with anxiety ( $t=-3.50$ ,  $p<0.01$ ), self-harm ( $t=-2.25$ ,  $p=0.03$ ), and  
229 suicidal presentations ( $t=-6.82$ ,  $p<0.01$ ), whilst presentations of overdoses ( $t=2.58$ ,  $p=0.02$ ) and affective  
230 disorders decreased ( $t=5.60$ ,  $p<0.01$ ). IL2 showed decreased rates of substance misuse, affective  
231 disorders, and suicidal presentations.

233 Overall, the broad patterns and relative distributions of key diagnosis groups did not change when study  
234 periods (lockdown and inter-lockdown periods) were compared with MTPs (Figs 2 and 3) except for  
235 during L1 when psychosis became the most common acute mental health diagnosis.

1  
2  
3 **236 Emergency Department assessment and outcome**  
4

5 237 Patients attending with an acute mental health presentation spent a considerable amount of time in the  
6  
7 238 emergency department before transfer was arranged to an appropriate inpatient mental health facility  
8  
9  
10 239 or they were assessed and discharged by the community mental health assessment team. Overall, the  
11  
12 240 mean time spent in the department for these patients was 6 hours 52 minutes (n= 14871, SD= 376.80)  
13  
14 241 with no significant variation when lockdown and inter-lockdown periods were compared (fig 5).  
15

16 242

17  
18 243 There were no significant differences in the proportions of patients being discharged directly or  
19  
20 244 transferred to an inpatient mental health care facility from the emergency department during the  
21  
22  
23 245 lockdown and inter-lockdown periods.  
24

25 246

26  
27  
28  
29  
30 247

31  
32  
33 248

34  
35  
36  
37 249

38  
39  
40  
41 250

42  
43  
44  
45 251

46  
47  
48  
49 252

50  
51  
52 253

## 254 **DISCUSSION**

255 There was considerable concern during the covid-19 pandemic that social isolation resulting from  
256 statutory lockdown periods would result in a considerable burden of mental health illness and  
257 morbidity.[3,4] There are several reports that patients have been making increased self-reports of  
258 symptoms of anxiety, depression and other acute mental health disorders since the beginning of the  
259 covid-19 pandemic.[5,6] The associated economic recession may also be an important factor.

260  
261 There is longstanding evidence that patients with acute mental health illness present to the emergency  
262 departments of acute general hospitals;[1] illness is not always specifically identified as physical or  
263 mental and the emergency department is identified as a place of safety where assessment and  
264 treatment can be started. Our study showed that considerable numbers of patients attend our  
265 emergency departments each week with acute mental health presentations. The covid-19 pandemic  
266 resulted in some variations in the patterns of mental health illness that were seen; mental health  
267 presentations during the first lockdown period fell as did all non-covid-19 related presentations in our  
268 emergency departments. The reasons for this are multi-factorial and likely include reduced social  
269 movement during lockdown as well as patient concern and fears about attending a hospital during a  
270 pandemic. These factors may mean that while the numbers presenting to the emergency department  
271 are reduced during the lockdown, this may underrepresent the true level of mental health morbidity in  
272 the community that is simply not presenting to hospital during the pandemic. This is possibly one  
273 explanation for the rebound increase in acute mental health presentations seen following a lockdown in  
274 the inter-lockdown period.

275

1  
2  
3 276 Our study showed that 4% of patients attending our emergency departments had an acute mental  
4  
5 277 health problem and 4% of patients although attending for a physical health complaint, were known to  
6  
7 278 have a concurrent mental health diagnosis. This supports the findings of the 2017 NCEPOD report and  
8  
9  
10 279 specifically the recommendations that there is a need for training and resource to equip staff in acute  
11  
12 280 general hospitals to address the needs of patients presenting with mental health illness. In the years  
13  
14 281 since the publication of the NCEPOD report, Treat as One. Bridging the gap between mental and physical  
15  
16 282 healthcare in general hospitals, our findings suggest that there is still considerable work to do in order to  
17  
18 283 achieve the standards and recommendations that it made.[1]  
19  
20

21 284  
22  
23 285 The fact that patients presenting with acute mental illness still suffer extended waiting times in the  
24  
25 286 emergency department is indicative of this failing. Again, this is likely to be multifactorial and may  
26  
27 287 represent delays in initial assessment or in the ability to exclude and treat physical illness appropriately  
28  
29 288 as well as a lack of capacity to transfer patients to an appropriate mental health care facility for timely  
30  
31 289 treatment but mean waiting times in the emergency department of 6-7 hours do not suggest that  
32  
33 290 mental and physical care are well integrated and suggest that there are opportunities to improve the  
34  
35 291 quality of care and experience for these patients.  
36  
37  
38

39 292

40  
41 293

42  
43 294

44  
45 295

46  
47 296

48  
49 297

50  
51 298

52  
53 299

1  
2  
3 300 **CONCLUSION**  
4  
5

6 301  
7  
8 302 Patients present to acute general hospitals with both physical and mental health complaints. Our study  
9  
10 303 shows that while the covid-19 pandemic and the use of lockdowns may have had some impact on the  
11  
12 304 patterns and specific mental health diagnoses that were seen in our emergency departments, the  
13  
14  
15 305 mental health workload and need in acute general hospitals is longstanding and has not been grossly  
16  
17 306 changed by the covid-19 pandemic.  
18

19 307  
20  
21 308 Our study does show that several years later, considerable work is still needed to provide integrated  
22  
23 309 care which addresses the physical and mental healthcare needs of patients presenting to acute general  
24  
25  
26 310 hospitals. The recommendations of the National Confidential Enquiry into Postoperative Outcome and  
27  
28 311 Death, 'Treat as One' remain as valid and important today as they were in 2017.  
29

30 312

31 313

32 314

33 315

34 316

35 317

36 318

37 319

38 320

39 321

40 322

41 323  
42  
43  
44  
45  
46  
47  
48  
49  
50  
51  
52  
53  
54  
55  
56  
57  
58  
59  
60



324 **REFERENCES**

- 325 1. The National Confidential Enquiry into Patient Outcome and Death. 'Treat as One. Bridging the  
326 gap between mental and physical healthcare in general hospitals'. [Internet]. 2017 [cited 12  
327 October 2021].  
328 [https://www.ncepod.org.uk/2017report1/downloads/TreatAsOne\\_FullReport.pdf](https://www.ncepod.org.uk/2017report1/downloads/TreatAsOne_FullReport.pdf)  
329 Last accessed 5 November 2021
- 330
- 331 2. Timeline of UK government coronavirus lockdowns [Internet]. The Institute for Government.  
332 2021 [cited 13 October 2021]. Available from:  
333 <https://www.instituteforgovernment.org.uk/charts/uk-government-coronavirus-lockdowns>  
334 Last accessed 5 November 2021
- 335
- 336 3. Luykx J, Vinkers C, Tjink J. Psychiatry in Times of the Coronavirus Disease 2019 (COVID-19)  
337 Pandemic. *JAMA Psychiatry*. 2020;77(11):1097.
- 338
- 339 4. Sheridan Rains L, Johnson S, Barnett P, et al. Early impacts of the COVID-19 pandemic on mental  
340 health care and on people with mental health conditions: framework synthesis of international  
341 experiences and responses. *Social Psychiatry and Psychiatric Epidemiology*. 2020;56(1):13-24.
- 342
- 343 5. Pierce M, Hope H, Ford T, et al. Mental health before and during the COVID-19 pandemic: a  
344 longitudinal probability sample survey of the UK population. *The Lancet Psychiatry*.  
345 2020;7(10):883-892.

- 1  
2  
3 347 6. Jia R, Ayling K, Chalder T, et al. Mental health in the UK during the COVID-19 pandemic: cross-  
4  
5 348 sectional analyses from a community cohort study. *BMJ Open*. 2020;10(9):e040620.  
6  
7  
8 349  
9  
10 350

### 11 351 **Contributorship statement**

12 352 All authors contributed to the study design. RA and JS conceived the study design. JC, RB and JB  
13  
14  
15 353 collected and analysed the data. JB undertook the statistical analysis. JC, RB, JB and JS contributed to the  
16  
17  
18 354 drafting and critical review of the manuscript. RA revised and edited the manuscript. All authors  
19  
20  
21 355 approved the final draft. The corresponding author attests that all listed authors meet authorship  
22  
23  
24 356 criteria and that no others meeting the criteria have been omitted. RA is the guarantor of this study.  
25

26 357

27  
28 358 JC, RB and JB contributed equally to this study and are recognised as joint first authors.  
29

30 359

### 31 360 **Competing interests**

32  
33 361 The authors have no competing interests to declare  
34  
35  
36 362

### 37 363 **Funding**

38  
39 364 None  
40  
41  
42 365

### 43 366 **Ethical approval**

44  
45 367 Ethical approval was not sought for this work. It was registered as a clinical audit in line with institutional  
46  
47  
48 368 policy and conducted in line with the Declaration of Helsinki as revised in 2013. The study was approved  
49  
50  
51 369 by the institutional clinical audit and effectiveness group.  
52  
53  
54  
55  
56  
57  
58  
59  
60

370

### What is already known about this topic

371

Patients often present to acute general hospitals with acute mental health illness or complex health needs combining physical and mental health elements which cannot always be easily separated.

372

373

Resources, training and experience in caring for acute mental health illness are not always readily available in acute general hospitals

374

375

### What this study adds

376

Large numbers of patients continue to attend acute general hospitals with acute mental health presentations.

377

378

379

Several years after the publication of the 'Treat as One' report by the National Confidential Enquiry into Patient Outcome and death, considerable work is still required to provide integrated care for patients presenting to acute general hospitals with acute mental health illness.

380

381

382

383

The covid-19 pandemic did affect the patterns and presentations of patients with acute mental health illness attending acute general hospitals.

384

385

386

387

388

389

### Figures and Legends

390

391

392

393

Figure 1 Mean number of presentations with acute mental health illness per week  
1 January 2018 - 30 June 2021

394

395

396

397

Figure 2 Patterns of diagnosis and presentation. Mean presentations per day during the covid-19 pandemic

398

399

400

401

Figure 3 Diagnosis patterns for acute mental health presentations  
1 January 2018-30 June 2021

402

403

404

405

Figure 4 Patterns of diagnosis and presentation. Mean presentations per day during the matched time periods (MTP)

406

407

408

409

Figure 5 Waiting time in the emergency department for patients attending with acute mental health presentations 1 January 2018 – 30 June 2021

410

411

412

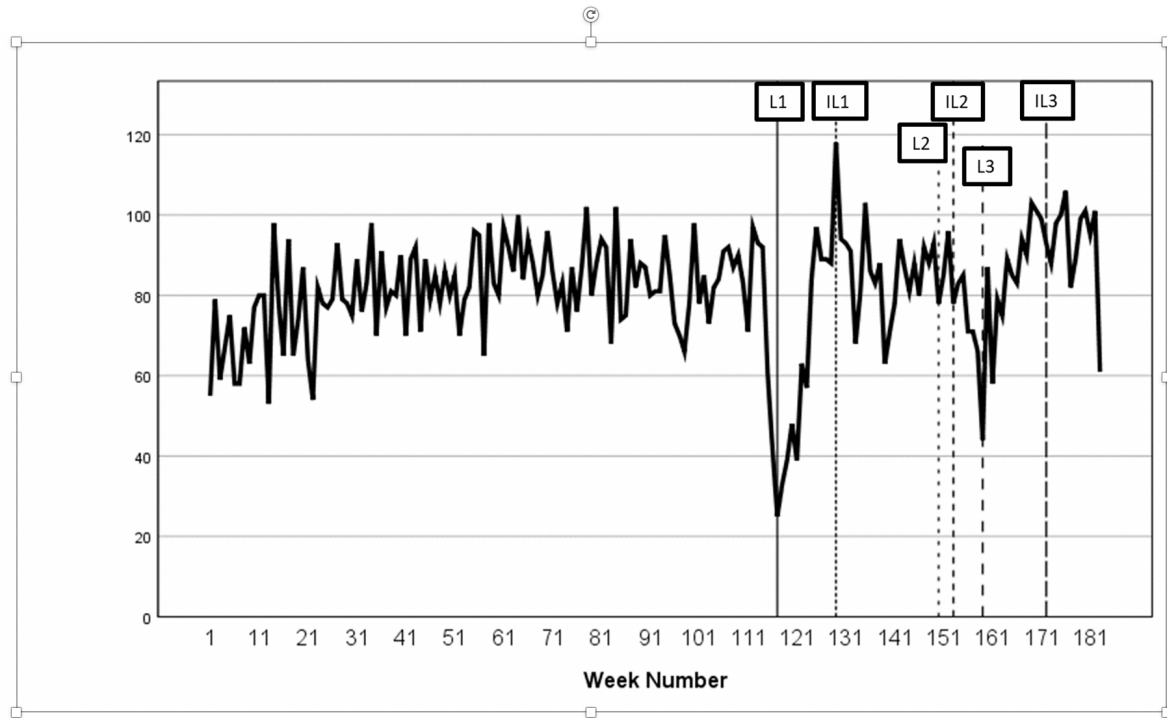

Figure 1 Mean number of presentations with acute mental health illness per week 1 January 2018 - 30 June 2021

view only

Figure 2 Patterns of diagnosis and presentation. Mean presentations per day during the covid-19 pandemic

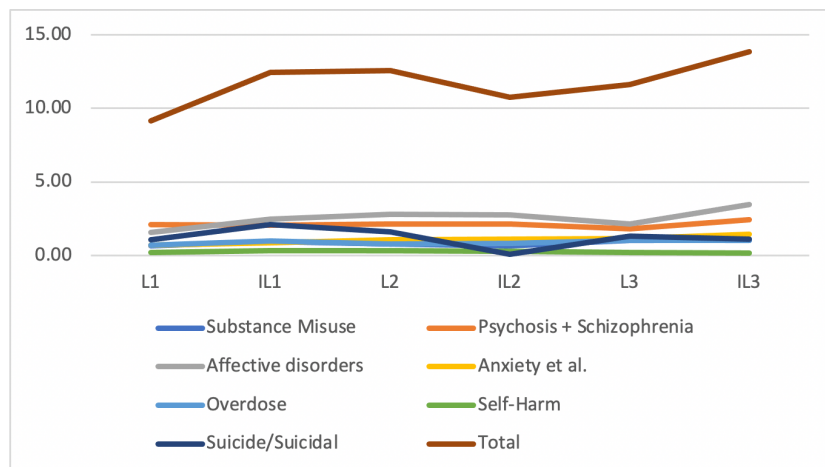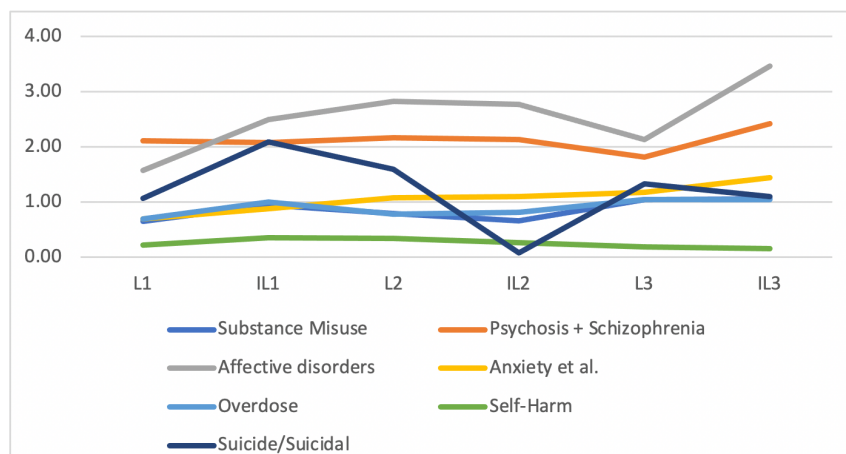

view only

Figure 3 Patterns of diagnosis and presentation. Mean presentations per day during the matched time periods (MTP)

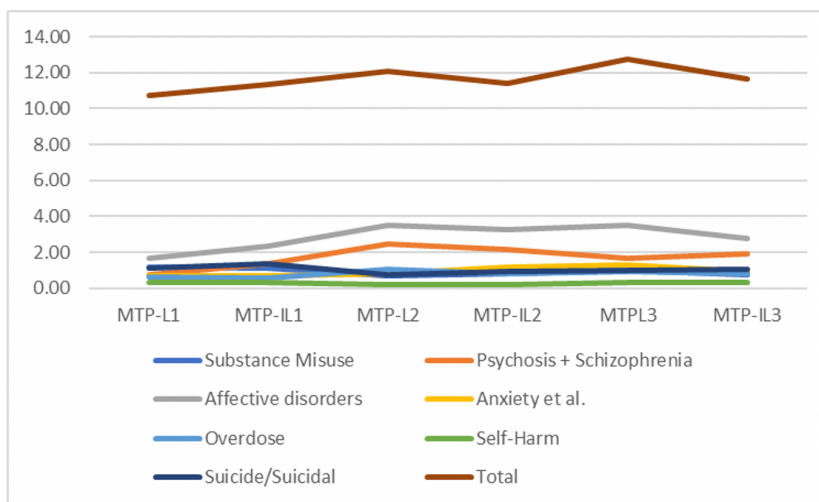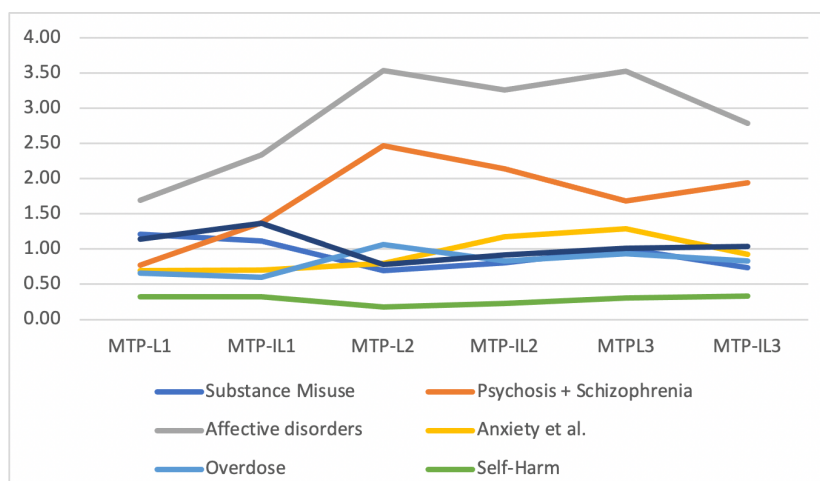

only

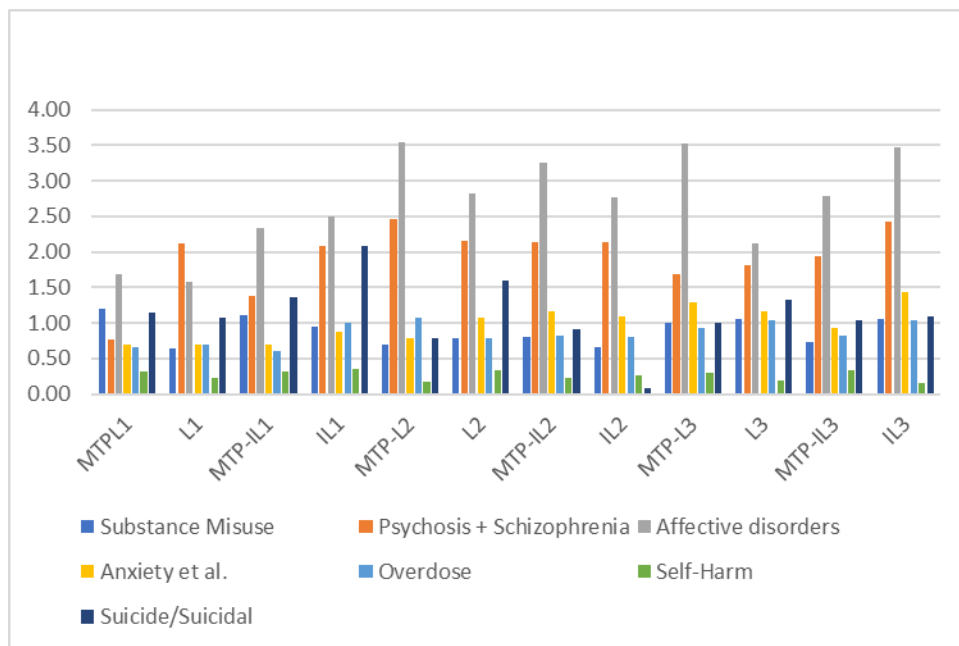

Figure 4 Diagnosis patterns for acute mental health presentations 1 January 2018-30 June 2021

Peer review only

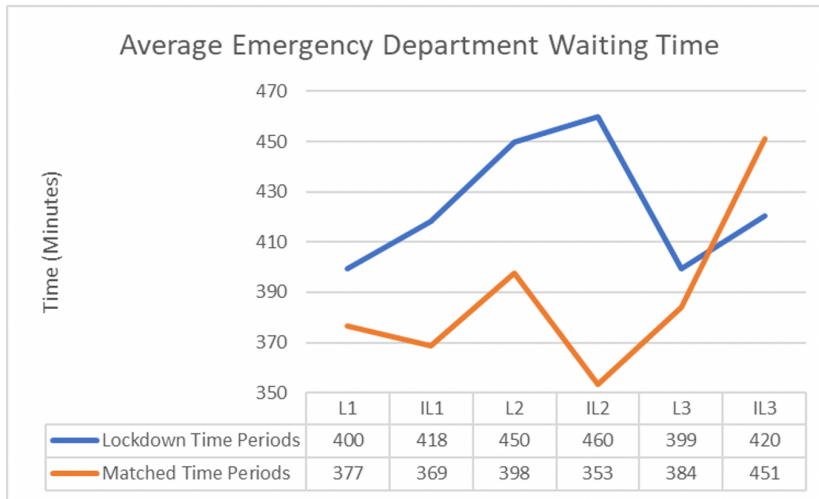

**Figure 5** Waiting time in the emergency department for patients attending with acute mental health presentations 1 January 2018 – 30 June 2021

Align to Right

review only



**The RECORD statement – checklist of items, extended from the STROBE statement, that should be reported in observational studies using routinely collected health data.**

|                      | Item No. | STROBE items                                                                                                                                                                               | Location in manuscript where items are reported | RECORD items                                                                                                                                                                                                                                                                                                                                                                                                                                | Location in manuscript where items are reported                         |
|----------------------|----------|--------------------------------------------------------------------------------------------------------------------------------------------------------------------------------------------|-------------------------------------------------|---------------------------------------------------------------------------------------------------------------------------------------------------------------------------------------------------------------------------------------------------------------------------------------------------------------------------------------------------------------------------------------------------------------------------------------------|-------------------------------------------------------------------------|
|                      | 1        | (a) Indicate the study's design with a commonly used term in the title or the abstract (b) Provide in the abstract an informative and balanced summary of what was done and what was found | Title Line 1<br>Abstract Line 49                | RECORD 1.1: The type of data used should be specified in the title or abstract. When possible, the name of the databases used should be included.<br><br>RECORD 1.2: If applicable, the geographic region and timeframe within which the study took place should be reported in the title or abstract.<br><br>RECORD 1.3: If linkage between databases was conducted for the study, this should be clearly stated in the title or abstract. | Methods Lines 143-145<br><br>Abstract Lines 51-54<br><br>Not applicable |
| <b>Introduction</b>  |          |                                                                                                                                                                                            |                                                 |                                                                                                                                                                                                                                                                                                                                                                                                                                             |                                                                         |
| Background rationale | 2        | Explain the scientific background and rationale for the investigation being reported                                                                                                       | Introduction Lines 92-125                       |                                                                                                                                                                                                                                                                                                                                                                                                                                             |                                                                         |
| Objectives           | 3        | State specific objectives, including any prespecified hypotheses                                                                                                                           | Introduction Lines 92-125                       |                                                                                                                                                                                                                                                                                                                                                                                                                                             |                                                                         |
| <b>Methods</b>       |          |                                                                                                                                                                                            |                                                 |                                                                                                                                                                                                                                                                                                                                                                                                                                             |                                                                         |
| Study Design         | 4        | Present key elements of study design early in the paper                                                                                                                                    | Methods Lines 140-162                           |                                                                                                                                                                                                                                                                                                                                                                                                                                             |                                                                         |
| Setting              | 5        | Describe the setting, locations, and relevant dates, including periods of recruitment, exposure, follow-up, and data collection                                                            | Abstract Lines 51-54<br>Methods Lines 140-162   |                                                                                                                                                                                                                                                                                                                                                                                                                                             |                                                                         |

|                              |   |                                                                                                                                                                                                                                                                                                                                                                                                                                                                                                                                                                                                                                                                                                                              |                                                                                                               |                                                                                                                                                                                                                                                                                                                                                                                                                                                                                                                                                                                                                                                                                                      |                                                                                       |
|------------------------------|---|------------------------------------------------------------------------------------------------------------------------------------------------------------------------------------------------------------------------------------------------------------------------------------------------------------------------------------------------------------------------------------------------------------------------------------------------------------------------------------------------------------------------------------------------------------------------------------------------------------------------------------------------------------------------------------------------------------------------------|---------------------------------------------------------------------------------------------------------------|------------------------------------------------------------------------------------------------------------------------------------------------------------------------------------------------------------------------------------------------------------------------------------------------------------------------------------------------------------------------------------------------------------------------------------------------------------------------------------------------------------------------------------------------------------------------------------------------------------------------------------------------------------------------------------------------------|---------------------------------------------------------------------------------------|
| Participants                 | 6 | <p>(a) <i>Cohort study</i> - Give the eligibility criteria, and the sources and methods of selection of participants. Describe methods of follow-up</p> <p><i>Case-control study</i> - Give the eligibility criteria, and the sources and methods of case ascertainment and control selection. Give the rationale for the choice of cases and controls</p> <p><i>Cross-sectional study</i> - Give the eligibility criteria, and the sources and methods of selection of participants</p> <p>(b) <i>Cohort study</i> - For matched studies, give matching criteria and number of exposed and unexposed</p> <p><i>Case-control study</i> - For matched studies, give matching criteria and the number of controls per case</p> | <p>Methods/Patients<br/>Lines 164-169</p> <p>Methods Matched<br/>time periods<br/>described lines 159-162</p> | <p>RECORD 6.1: The methods of study population selection (such as codes or algorithms used to identify subjects) should be listed in detail. If this is not possible, an explanation should be provided.</p> <p>RECORD 6.2: Any validation studies of the codes or algorithms used to select the population should be referenced. If validation was conducted for this study and not published elsewhere, detailed methods and results should be provided.</p> <p>RECORD 6.3: If the study involved linkage of databases, consider use of a flow diagram or other graphical display to demonstrate the data linkage process, including the number of individuals with linked data at each stage.</p> | <p>Methods/Patients<br/>Lines 164-169</p> <p>Not applicable</p> <p>Not applicable</p> |
| Variables                    | 7 | Clearly define all outcomes, exposures, predictors, potential confounders, and effect modifiers. Give diagnostic criteria, if applicable.                                                                                                                                                                                                                                                                                                                                                                                                                                                                                                                                                                                    | Methods/Patients studied outcomes recorded Lines 165-170                                                      | RECORD 7.1: A complete list of codes and algorithms used to classify exposures, outcomes, confounders, and effect modifiers should be provided. If these cannot be reported, an explanation should be provided.                                                                                                                                                                                                                                                                                                                                                                                                                                                                                      | Not applicable                                                                        |
| Data sources/<br>measurement | 8 | For each variable of interest, give sources of data and details of methods of assessment (measurement). Describe comparability of assessment methods if there is more than one group                                                                                                                                                                                                                                                                                                                                                                                                                                                                                                                                         | Methods/Patients<br>Lines 165-170<br>Lines 140-145                                                            |                                                                                                                                                                                                                                                                                                                                                                                                                                                                                                                                                                                                                                                                                                      |                                                                                       |

|                                  |    |                                                                                                                                                                                                                                                                                                                                                                                                                                                                                                                                                                                                     |                                                                                                 |                                                                                                       |                                 |
|----------------------------------|----|-----------------------------------------------------------------------------------------------------------------------------------------------------------------------------------------------------------------------------------------------------------------------------------------------------------------------------------------------------------------------------------------------------------------------------------------------------------------------------------------------------------------------------------------------------------------------------------------------------|-------------------------------------------------------------------------------------------------|-------------------------------------------------------------------------------------------------------|---------------------------------|
| Bias                             | 9  | Describe any efforts to address potential sources of bias                                                                                                                                                                                                                                                                                                                                                                                                                                                                                                                                           | The use of HES data which is nationally collected and validated lines 140-145 and lines 165-170 |                                                                                                       |                                 |
| Study size                       | 10 | Explain how the study size was arrived at                                                                                                                                                                                                                                                                                                                                                                                                                                                                                                                                                           | Methods Lines 140-145                                                                           |                                                                                                       |                                 |
| Quantitative variables           | 11 | Explain how quantitative variables were handled in the analyses. If applicable, describe which groupings were chosen, and why                                                                                                                                                                                                                                                                                                                                                                                                                                                                       | Methods/Statistical analysis Lines 171-174                                                      |                                                                                                       |                                 |
| Statistical methods              | 12 | <p>(a) Describe all statistical methods, including those used to control for confounding</p> <p>(b) Describe any methods used to examine subgroups and interactions</p> <p>(c) Explain how missing data were addressed</p> <p>(d) <i>Cohort study</i> - If applicable, explain how loss to follow-up was addressed</p> <p><i>Case-control study</i> - If applicable, explain how matching of cases and controls was addressed</p> <p><i>Cross-sectional study</i> - If applicable, describe analytical methods taking account of sampling strategy</p> <p>(e) Describe any sensitivity analyses</p> | <p>Methods/Statistical analysis Lines 171-174</p> <p>Not applicable</p>                         |                                                                                                       |                                 |
| Data access and cleaning methods |    | ..                                                                                                                                                                                                                                                                                                                                                                                                                                                                                                                                                                                                  |                                                                                                 | RECORD 12.1: Authors should describe the extent to which the investigators had access to the database | Not applicable<br>12.1 and 12.2 |

|                  |    |                                                                                                                                                                                                                                                                                                                                                 |                                                                                                                 |                                                                                                                                                                                                                                                                                                                    |                       |
|------------------|----|-------------------------------------------------------------------------------------------------------------------------------------------------------------------------------------------------------------------------------------------------------------------------------------------------------------------------------------------------|-----------------------------------------------------------------------------------------------------------------|--------------------------------------------------------------------------------------------------------------------------------------------------------------------------------------------------------------------------------------------------------------------------------------------------------------------|-----------------------|
|                  |    |                                                                                                                                                                                                                                                                                                                                                 |                                                                                                                 | population used to create the study population.<br><br>RECORD 12.2: Authors should provide information on the data cleaning methods used in the study.                                                                                                                                                             |                       |
| Linkage          |    | ..                                                                                                                                                                                                                                                                                                                                              |                                                                                                                 | RECORD 12.3: State whether the study included person-level, institutional-level, or other data linkage across two or more databases. The methods of linkage and methods of linkage quality evaluation should be provided.                                                                                          | Not applicable        |
| <b>Results</b>   |    |                                                                                                                                                                                                                                                                                                                                                 |                                                                                                                 |                                                                                                                                                                                                                                                                                                                    |                       |
| Participants     | 13 | (a) Report the numbers of individuals at each stage of the study ( <i>e.g.</i> , numbers potentially eligible, examined for eligibility, confirmed eligible, included in the study, completing follow-up, and analysed)<br>(b) Give reasons for non-participation at each stage.<br>(c) Consider use of a flow diagram                          | Methods All patients selected Lines 140-169                                                                     | RECORD 13.1: Describe in detail the selection of the persons included in the study ( <i>i.e.</i> , study population selection) including filtering based on data quality, data availability and linkage. The selection of included persons can be described in the text and/or by means of the study flow diagram. | Methods Lines 140-169 |
| Descriptive data | 14 | (a) Give characteristics of study participants ( <i>e.g.</i> , demographic, clinical, social) and information on exposures and potential confounders<br>(b) Indicate the number of participants with missing data for each variable of interest<br>(c) <i>Cohort study</i> - summarise follow-up time ( <i>e.g.</i> , average and total amount) | Results lines 186-243<br><br>Not applicable<br><br>Study period defined lines<br>Methods/Patients Lines 165-170 |                                                                                                                                                                                                                                                                                                                    |                       |

|                                                                                              |                   |    |                                                                                                                                                                                                                                                                                                                                                                                                                 |                                                |                                                                                                                                                                                                                                                       |                                                |
|----------------------------------------------------------------------------------------------|-------------------|----|-----------------------------------------------------------------------------------------------------------------------------------------------------------------------------------------------------------------------------------------------------------------------------------------------------------------------------------------------------------------------------------------------------------------|------------------------------------------------|-------------------------------------------------------------------------------------------------------------------------------------------------------------------------------------------------------------------------------------------------------|------------------------------------------------|
| 1<br>2<br>3<br>4<br>5<br>6<br>7<br>8<br>9<br>10<br>11                                        | Outcome data      | 15 | <i>Cohort study</i> - Report numbers of outcome events or summary measures over time<br><i>Case-control study</i> - Report numbers in each exposure category, or summary measures of exposure<br><i>Cross-sectional study</i> - Report numbers of outcome events or summary measures                                                                                                                            | Results lines 186-243                          |                                                                                                                                                                                                                                                       |                                                |
| 12<br>13<br>14<br>15<br>16<br>17<br>18<br>19<br>20<br>21<br>22<br>23<br>24<br>25<br>26<br>27 | Main results      | 16 | (a) Give unadjusted estimates and, if applicable, confounder-adjusted estimates and their precision (e.g., 95% confidence interval). Make clear which confounders were adjusted for and why they were included<br>(b) Report category boundaries when continuous variables were categorized<br>(c) If relevant, consider translating estimates of relative risk into absolute risk for a meaningful time period | Results lines 186-243                          |                                                                                                                                                                                                                                                       |                                                |
| 28<br>29<br>30<br>31<br>32                                                                   | Other analyses    | 17 | Report other analyses done— e.g., analyses of subgroups and interactions, and sensitivity analyses                                                                                                                                                                                                                                                                                                              | Statistical analysis lines 172-175             |                                                                                                                                                                                                                                                       |                                                |
| 33                                                                                           | <b>Discussion</b> |    |                                                                                                                                                                                                                                                                                                                                                                                                                 |                                                |                                                                                                                                                                                                                                                       |                                                |
| 34<br>35                                                                                     | Key results       | 18 | Summarise key results with reference to study objectives                                                                                                                                                                                                                                                                                                                                                        |                                                |                                                                                                                                                                                                                                                       |                                                |
| 36<br>37<br>38<br>39<br>40<br>41<br>42<br>43<br>44                                           | Limitations       | 19 | Discuss limitations of the study, taking into account sources of potential bias or imprecision. Discuss both direction and magnitude of any potential bias                                                                                                                                                                                                                                                      | Limitations and strengths of study lines 80-86 | RECORD 19.1: Discuss the implications of using data that were not created or collected to answer the specific research question(s). Include discussion of misclassification bias, unmeasured confounding, missing data, and changing eligibility over | Limitations and strengths of study lines 80-86 |

|                                                                |                                                           |    |                                                                                                                                                                            |                                                                                                                                                          |                |
|----------------------------------------------------------------|-----------------------------------------------------------|----|----------------------------------------------------------------------------------------------------------------------------------------------------------------------------|----------------------------------------------------------------------------------------------------------------------------------------------------------|----------------|
|                                                                |                                                           |    |                                                                                                                                                                            | time, as they pertain to the study being reported.                                                                                                       |                |
| 1<br>2<br>3<br>4<br>5<br>6<br>7<br>8<br>9                      | Interpretation                                            | 20 | Give a cautious overall interpretation of results considering objectives, limitations, multiplicity of analyses, results from similar studies, and other relevant evidence | Discussion lines 251-288                                                                                                                                 |                |
| 10<br>11<br>12<br>13<br>14<br>15<br>16<br>17<br>18<br>19<br>20 | Generalisability                                          | 21 | Discuss the generalisability (external validity) of the study results                                                                                                      | Limitations and strengths of study lines 80-86<br><br>Generalisability and previous studies/NCEPOD report cited lines 275-280                            |                |
| 21                                                             | <b>Other Information</b>                                  |    |                                                                                                                                                                            |                                                                                                                                                          |                |
| 22<br>23<br>24<br>25<br>26<br>27                               | Funding                                                   | 22 | Give the source of funding and the role of the funders for the present study and, if applicable, for the original study on which the present article is based              | No funding<br><br>Funding statement Lines 357-358                                                                                                        |                |
| 28<br>29<br>30<br>31<br>32<br>33                               | Accessibility of protocol, raw data, and programming code |    | ..                                                                                                                                                                         | RECORD 22.1: Authors should provide information on how to access any supplemental information such as the study protocol, raw data, or programming code. | Not applicable |

\*Reference: Benchimol EI, Smeeth L, Guttman A, Harron K, Moher D, Petersen I, Sørensen HT, von Elm E, Langan SM, the RECORD Working Committee. The REporting of studies Conducted using Observational Routinely-collected health Data (RECORD) Statement. *PLoS Medicine* 2015; in press.

\*Checklist is protected under Creative Commons Attribution ([CC BY](https://creativecommons.org/licenses/by/4.0/)) license.

# BMJ Open

## Patients presenting to an acute general hospital with acute mental health needs. A retrospective observational cohort study.

|                                 |                                                                                                                                                                                                                                                                                                                                                                                                                                                   |
|---------------------------------|---------------------------------------------------------------------------------------------------------------------------------------------------------------------------------------------------------------------------------------------------------------------------------------------------------------------------------------------------------------------------------------------------------------------------------------------------|
| Journal:                        | <i>BMJ Open</i>                                                                                                                                                                                                                                                                                                                                                                                                                                   |
| Manuscript ID                   | bmjopen-2021-059102.R1                                                                                                                                                                                                                                                                                                                                                                                                                            |
| Article Type:                   | Original research                                                                                                                                                                                                                                                                                                                                                                                                                                 |
| Date Submitted by the Author:   | 31-Jan-2022                                                                                                                                                                                                                                                                                                                                                                                                                                       |
| Complete List of Authors:       | Cann, Johnathon; Imperial College Healthcare NHS Trust, Trauma and Orthopaedics<br>Barter, Reece; Imperial College Healthcare NHS Trust, Trauma and Orthopaedics<br>Battle, Joseph; Imperial College Healthcare NHS Trust, Trauma and Orthopaedics<br>Schwenck, Jonas; Imperial College Healthcare NHS Trust, Trauma and Orthopaedics<br>Anakwe, Raymond; Imperial College Healthcare NHS Trust, Trauma and Orthopaedics; Imperial College London |
| <b>Primary Subject Heading</b>: | Health policy                                                                                                                                                                                                                                                                                                                                                                                                                                     |
| Secondary Subject Heading:      | Health services research                                                                                                                                                                                                                                                                                                                                                                                                                          |
| Keywords:                       | MENTAL HEALTH, COVID-19, Health policy < HEALTH SERVICES ADMINISTRATION & MANAGEMENT, ACCIDENT & EMERGENCY MEDICINE                                                                                                                                                                                                                                                                                                                               |
|                                 |                                                                                                                                                                                                                                                                                                                                                                                                                                                   |

SCHOLARONE™  
Manuscripts



I, the Submitting Author has the right to grant and does grant on behalf of all authors of the Work (as defined in the below author licence), an exclusive licence and/or a non-exclusive licence for contributions from authors who are: i) UK Crown employees; ii) where BMJ has agreed a CC-BY licence shall apply, and/or iii) in accordance with the terms applicable for US Federal Government officers or employees acting as part of their official duties; on a worldwide, perpetual, irrevocable, royalty-free basis to BMJ Publishing Group Ltd ("BMJ") its licensees and where the relevant Journal is co-owned by BMJ to the co-owners of the Journal, to publish the Work in this journal and any other BMJ products and to exploit all rights, as set out in our [licence](#).

The Submitting Author accepts and understands that any supply made under these terms is made by BMJ to the Submitting Author unless you are acting as an employee on behalf of your employer or a postgraduate student of an affiliated institution which is paying any applicable article publishing charge ("APC") for Open Access articles. Where the Submitting Author wishes to make the Work available on an Open Access basis (and intends to pay the relevant APC), the terms of reuse of such Open Access shall be governed by a Creative Commons licence – details of these licences and which [Creative Commons](#) licence will apply to this Work are set out in our licence referred to above.

Other than as permitted in any relevant BMJ Author's Self Archiving Policies, I confirm this Work has not been accepted for publication elsewhere, is not being considered for publication elsewhere and does not duplicate material already published. I confirm all authors consent to publication of this Work and authorise the granting of this licence.



1  
2  
3  
4 1 **Patients presenting to an acute general hospital with acute mental health**  
5 2 **needs. A retrospective observational cohort study.**  
6 3

7 4 Full name: **Johnathon Cann**

8 5 Department: Trauma & Orthopaedics

9 6 Institution: Imperial College Healthcare NHS Trust

10 7 City: London

11 8 Country: UK

12 9  
13  
14 10 Full name: **Reece Barter**

15 11 Department: Trauma & Orthopaedics

16 12 Institution: Imperial College Healthcare NHS Trust

17 13 City: London

18 14 Country: UK

19 15  
20 16 Full name: **Joseph Battle**

21 17 Department: Trauma & Orthopaedics

22 18 Institution: Imperial College Healthcare NHS Trust

23 19 City: London

24 20 Country: UK

25 21  
26 22 Full name: **Jonas Schwenck**

27 23 Department: Trauma & Orthopaedics

28 24 Institution: Imperial College Healthcare NHS Trust

29 25 City: London

30 26 Country: UK

31 27  
32 28 Full name: **Raymond E Anakwe** (Corresponding author)

33 29 Department: Trauma & Orthopaedics

34 30 Institution:1. Imperial College Healthcare NHS Trust. London

35 31 2. Imperial College, London

36 32  
37 33 St Mary's Hospital

38 34 Imperial College Healthcare NHS Trust

39 35 Praed Street

40 36 London

41 37 W2 1NY

42 38 Email: raymond.anakwe@nhs.net

43 39  
44 40 Word count: 2055

45 41

46 42

47 43

## 44 **ABSTRACT**

### 45 **Objectives**

46 To examine the numbers and patterns of patients presenting to an urban acute general hospital with  
47 acute mental health presentations and to further investigate any variation related to the covid  
48 pandemic.

### 50 **Design**

51 Retrospective observational cohort study.

### 53 **Setting**

54 An urban acute general hospital in London, United Kingdom, comprising of five sites and two emergency  
55 departments. The hospital provides tertiary level general acute care but is not an acute mental health  
56 services provider. There is an inpatient liaison psychiatry service

### 58 **Participants**

59 358131 patients attended the emergency departments of our acute general hospital during the study  
60 period. Of these, 14871 patients attended with an acute mental health presentation. A further 14947  
61 patients attending with a physical illness were also noted to have a concurrent recorded mental health  
62 diagnosis.

### 64 **Results**

65 Large numbers of patients present to our acute general hospital with mental health illness even though  
66 the organisation does not provide mental health services other than inpatient liaison psychiatry. There  
67 was some variation in the numbers and patterns of presentations related to the Covid-19 pandemic.

1  
2  
3 68 Patient numbers reduced to a mean of 9.13 (SD 3.38) patients presenting per day during the first  
4  
5 69 'lockdown' compared with 10.75 (SD 1.96) patients per day in an earlier matched time period (t=3.80,  
6  
7 70 p<0.01). Acute mental health presentations following the third lockdown increased to a mean of 13.84 a  
8  
9 71 day.  
10  
11  
12 72

### 14 73 **Conclusions**

16 74 Large numbers of patients present to our acute general hospital with mental health illness. This suggests  
17  
18 75 a need for appropriate resource, staffing and training to address the needs of these patients in a non-  
19  
20 76 mental health provider organisation and subsequent appropriate transfer for timely treatment. The  
21  
22 77 Covid-19 pandemic and the resulting lockdowns have resulted in variation in the numbers and patterns  
23  
24 78 of patients presenting with acute mental health illness but, these presentations are not new.  
25  
26 79 Considerable work is still needed to provide integrated care which addresses the physical and mental  
27  
28 80 healthcare needs of patients presenting to acute and general hospitals  
29  
30  
31  
32 81

### 34 82 **Strengths and limitations of this study**

- 36  
37 83
- 38 • This is a retrospective study
  - 39 84 • The study examines a large number of patient care episodes.
  - 40 85 • Diagnostic coding is open to error in recording and interpretation.
  - 41 86 • There is implicit risk in using routinely collected data to evaluate a research question where the
  - 42 87 data may have not been collected for this specific purpose
  - 43 88
  - 44 89
  - 45 90
  - 46 91
  - 47
  - 48
  - 49
  - 50
  - 51
  - 52
  - 53
  - 54
  - 55
  - 56
  - 57
  - 58
  - 59
  - 60

### 51 89 **KEY WORDS**

53 90 Mental health, Covid-19, lockdown, emergency department, acute general hospital

1  
2  
3  
4  
5  
6  
7  
8  
9  
10  
11  
12  
13  
14  
15  
16  
17  
18  
19  
20  
21  
22  
23  
24  
25  
26  
27  
28  
29  
30  
31  
32  
33  
34  
35  
36  
37  
38  
39  
40  
41  
42  
43  
44  
45  
46  
47  
48  
49  
50  
51  
52  
53  
54  
55  
56  
57  
58  
59  
60

92 **DATA SHARING STATEMENT**

93 Data are available upon reasonable request.

94  
95  
96  
97  
98  
99  
100  
101  
102  
103  
104  
105  
106  
107  
108  
109  
110  
111  
112  
113

For peer review only

## 114 INTRODUCTION

115  
116 There is significant overlap in the mental and physical health needs for patients and for some time it has  
117 been an aspiration to offer integrated care. The National Confidential Enquiry into Patient Outcome and  
118 Death (NCEPOD) investigated and reported on the mental health needs of patients treated in acute  
119 general hospitals for physical illnesses in 2017 and made several recommendations.[1] Key among these  
120 were that all hospital staff who have interaction with patients, including clinical, clerical and security  
121 staff, should receive training in mental health conditions in general hospitals. Training should be  
122 developed and offered across the entire career pathway from undergraduate to workplace based  
123 continued professional development. The report also recommended that in order to overcome the  
124 divide between mental and physical healthcare, liaison psychiatry services should be fully integrated  
125 into general hospitals. The structure and staffing of the liaison psychiatry service should be based on the  
126 clinical demand both within working hours and out-of-hours so that they can participate as part of the  
127 multidisciplinary team. These recommendations have only been adopted in part in many places and still  
128 represent a challenge several years later.

129  
130 The delivery of truly integrated assessment and care for patients presenting to acute general hospitals  
131 where mental health services are not normally provided requires careful planning and an understanding  
132 of the numbers and types of patients presenting. This is so that an assessment can be made as to what is  
133 required to meet their needs and to provide high-quality care and patient experience.

134  
135 We undertook this study to examine the numbers and patterns of patients presenting to an urban acute  
136 general hospital with acute mental health presentations via the emergency department. This hospital  
137 does not provide any routine mental health services other than an inpatient liaison psychiatry service.

1  
2  
3 138 We hypothesised that our study would confirm a large number of patients presenting with acute  
4  
5 139 episodes of mental health conditions despite the fact that the hospital does not provide mental health  
6  
7 140 services. We further hypothesised that our study would demonstrate increasing numbers of patients  
8  
9 141 presenting in this way over time and that this might be representative of the situation more generally  
10  
11 142 and beyond our organisation.  
12  
13

14 143

16 144 The period of our study included the first waves of the global covid-19 pandemic and so we also  
17  
18 145 examined whether there was any effect on the patterns and numbers of patient presentations as a  
19  
20 146 result of the pandemic and the social restrictions associated with the mandated periods of social  
21  
22 147 lockdown where normal mixing and social interaction were severely restricted. We hypothesised that  
23  
24 148 the periods of the social lockdown would result in increasing numbers of patients presenting via the  
25  
26 149 emergency department with acute mental health needs.  
27  
28  
29

30 150

31 151

32 152

33 153

34 154

35 155

36 156

37 157

38 158

39 159

40 160

## 161 **METHODS**

### 163 **Data and setting**

164 We conducted a retrospective observational cohort study of all patients presenting to an urban acute  
165 general hospital with an acute mental health illness presentation. Our hospital organisation is made up  
166 of 5 hospital sites served by 2 acute emergency departments. Presentations to both emergency  
167 departments were included. All hospital attendances, admissions and treatments are recorded and  
168 coded to form data for Hospital Episode Statistics (HES) and are also recorded in the electronic patient  
169 record (EPR).

171 We used the United Kingdom government website to confirm the dates of mandated social lockdown (L)  
172 periods.[2] We included the 3 periods of national lockdown in the United Kingdom which occurred  
173 during the study period.

175 Lockdown 1 (L1) was defined between 23 March 2020 and 15 June 2020. Lockdown 2 (L2) was defined  
176 between 5 November 2020 and 2 December 2020. Lockdown 3 (L3) was defined between 6 January  
177 2021 and 12 April 2021. For analysis and comparison, we defined the periods between the statutory  
178 periods of lockdown to be 'inter-lockdown' (IL) periods. Inter-lockdown 1 (IL1) was therefore defined  
179 between 16 June 2020 and 4 November 2020. Inter-lockdown 2 (IL2) was defined between 3 December  
180 2020 and 5 January 2021. Inter-lockdown 3 (IL3) was defined between 13 April 2021 and 30 June 2021,  
181 when the study period ended after the final national lockdown.

183 Numbers and patterns of presentation were examined longitudinally to identify trends. We also  
184 examined and compared data for lockdown (L) and inter-lockdown (IL) periods with matched time

185 periods (MTP) between March 2018 and June 2019 in order to examine for any effects related to the  
186 covid-19 pandemic.

187

### 188 **Patients**

189 We included all adult patients aged 18 years and older. We examined the hospital coding records and  
190 electronic patient records for all adult patients attending our emergency departments with an acute  
191 mental health presentation between 1 January 2018 and 30 June 2021. HES data and patient records  
192 were examined to collate demographic information, diagnosis, details of initial referral and treatment,  
193 waiting times and admission.

194

### 195 **Statistical analysis**

196 We analysed data using SPSS Statistics version 26.0. We present data as means with standard deviations  
197 or median values with interquartile ranges. We used the standard t-test, Chi-squared tests, and ANOVA  
198 with post-hoc Tukey test to compare categorical and continuous data between matched time periods.

199

### 200 **Patient and public involvement**

201 Patients and the public were not involved in framing or designing this research question. As it is a  
202 retrospective cohort study there was no patient impact. We did ask strategic lay forum members at our  
203 hospital to read and comment on our manuscript.

204

205

206

207

208



## 209 RESULTS

210

### 211 Numbers of patients

212 358131 patients attended our emergency departments between 1 January 2018 and 30 June 2021. Of  
213 these, 14871 patients (4.2%) presented to our emergency departments with an acute mental health  
214 diagnosis (fig 1). In addition, 14947 patients (4.2%) who presented with a physical complaint also had a  
215 concurrent recorded mental health diagnosis.

216

### 217 Presentations

218 The numbers of patients presenting during the covid-19 pandemic varied considerably. The numbers of  
219 patients presenting with acute mental health illness was at the lowest level during the first lockdown  
220 (L1) period (fig 2). When compared with a matched time period (MTP) in 2018, 761 patients presented  
221 acutely in L1 compared with 897 patients in MTP1 (figs 2 and 3). This represents a mean of 9.13 (SD  
222 3.38) patients presenting per day during L1 compared with 10.75 (SD 1.96) patients per day during MTP1  
223 ( $t=3.80$ ,  $p<0.01$ ).

224

225 Following the first lockdown there was a significant increase in acute mental health presentations during  
226 IL1 compared with a MTP in 2018 ( $t=-5.34$ ,  $p<0.01$ ). There was a similar increase in acute mental health  
227 presentations following the third lockdown in IL3, with a mean 13.84 acute mental health presentations  
228 per day which was significantly greater than the number of attendances for the MTP in 2019 ( $t=-10.79$ ,  
229  $p<0.01$ )

230

231

232

### 233 **Age**

234 The mean age of patients presenting to the department was 38.57 years (n= 14871, SD= 15.041). There  
235 was no significant difference in the age of presentation when different time periods were compared.  
236 (ANOVA,  $f=2.0357$ ,  $p=0.0574$ ).

237

### 238 **Diagnoses and patterns of illness**

239 There was variation in the pattern of mental health illness presenting to our emergency departments  
240 (figs 4a and 4b). We noted a significant increase ( $t=-13.62$ ,  $p<0.01$ ) in patients presenting with psychosis  
241 in L1. There were a mean 2.11 (SD 0.85) presentations of psychosis per day during L1 compared with a  
242 mean 0.77 (SD 0.30) of such presentations during the respective MTP. In contrast, we saw a significant  
243 decrease in presenting rates of self-harm ( $t=-2.45$ ,  $p=0.02$ ) and substance misuse ( $t=6.28$ ,  $p<0.01$ ) per  
244 day in L1 when compared to the MTP.

245

246 IL1 saw an increase in patients presenting with acute psychosis ( $t=-8.56$ ,  $p<0.01$ ), anxiety ( $t=-4.41$ ,  
247  $p<0.01$ ), overdose ( $t=-11.7$ ,  $p<0.01$ ), and suicidal presentations ( $t=-7.34$ ,  $p<0.01$ ), compared to the  
248 respective MTP, whilst substance misuse presentations decreased ( $t=2.56$ ,  $p=0.01$ ). In L2 we recorded a  
249 continuing increase in patients attending with anxiety ( $t=-3.50$ ,  $p<0.01$ ), self-harm ( $t=-2.25$ ,  $p=0.03$ ), and  
250 suicidal presentations ( $t=-6.82$ ,  $p<0.01$ ), whilst presentations of overdoses ( $t=2.58$ ,  $p=0.02$ ) and affective  
251 disorders decreased ( $t=5.60$ ,  $p<0.01$ ). IL2 showed decreased rates of substance misuse, affective  
252 disorders, and suicidal presentations.

253

254 Overall, the broad patterns and relative distributions of key diagnosis groups did not change when study  
255 periods (lockdown and inter-lockdown periods) were compared with MTPs (figs 2 and 3) except for  
256 during L1 when psychosis became the most common acute mental health diagnosis.

1  
2  
3 257 **Emergency Department assessment and outcome**  
4

5 258 Patients attending with an acute mental health presentation spent a considerable amount of time in the  
6  
7 259 emergency department before transfer was arranged to an appropriate inpatient mental health facility  
8  
9  
10 260 or they were assessed and discharged by the community mental health assessment team. Overall, the  
11  
12 261 mean time spent in the department for these patients was 6 hours 52 minutes (n= 14871, SD= 376.80)  
13  
14 262 with no significant variation when lockdown and inter-lockdown periods were compared (fig 5).  
15

16 263  
17  
18 264 There were no significant differences in the proportions of patients being discharged directly or  
19  
20 265 transferred to an inpatient mental health care facility from the emergency department during the  
21  
22 266 lockdown and inter-lockdown periods.  
23  
24

25  
26 267  
27

28  
29  
30 268  
31

32  
33 269  
34  
35

36  
37 270  
38  
39

40  
41 271  
42  
43

44  
45 272  
46  
47

48  
49 273  
50  
51

52  
53 274  
54  
55

## 275 **DISCUSSION**

276 There was considerable concern during the covid-19 pandemic that social isolation resulting from  
277 statutory lockdown periods would result in a considerable burden of mental health illness and  
278 morbidity.[3,4] There are several reports that patients have been making increased self-reports of  
279 symptoms of anxiety, depression and other acute mental health disorders since the beginning of the  
280 covid-19 pandemic.[5,6] The associated economic recession may also be an important factor.

281  
282 There is longstanding evidence that patients with acute mental health illness present to the emergency  
283 departments of acute general hospitals;[1] illness is not always specifically identified as physical or  
284 mental and the emergency department is identified as a place of safety where assessment and  
285 treatment can be started. Our study showed that considerable numbers of patients attend our  
286 emergency departments each week with acute mental health presentations. The covid-19 pandemic  
287 resulted in some variations in the patterns of mental health illness that were seen; mental health  
288 presentations during the first lockdown period fell as did all non-covid-19 related presentations in our  
289 emergency departments. The reasons for this are multi-factorial and likely include reduced social  
290 movement during lockdown as well as patient concern and fears about attending a hospital during a  
291 pandemic. These factors may mean that while the numbers presenting to the emergency department  
292 are reduced during the lockdown, this may underrepresent the true level of mental health morbidity in  
293 the community that is simply not presenting to hospital during the pandemic. This is possibly one  
294 explanation for the rebound increase in acute mental health presentations seen following a lockdown in  
295 the inter-lockdown period.

296

1  
2  
3 297 Our study showed that 4% of patients attending our emergency departments had an acute mental  
4  
5 298 health problem and 4% of patients although attending for a physical health complaint, were known to  
6  
7 299 have a concurrent mental health diagnosis. This supports the findings of the 2017 NCEPOD report and  
8  
9  
10 300 specifically the recommendations that there is a need for training and resource to equip staff in acute  
11  
12 301 general hospitals to address the needs of patients presenting with mental health illness. In the years  
13  
14 302 since the publication of the NCEPOD report, Treat as One. Bridging the gap between mental and physical  
15  
16 303 healthcare in general hospitals, our findings suggest that there is still considerable work to do in order to  
17  
18 304 achieve the standards and recommendations that it made.[1]  
19  
20

21 305  
22  
23 306 The fact that patients presenting with acute mental illness still suffer extended waiting times in the  
24  
25 307 emergency department is indicative of this failing. Again, this is likely to be multifactorial and may  
26  
27 308 represent delays in initial assessment or in the ability to exclude and treat physical illness appropriately.  
28  
29 309 Patients attending the emergency department may need to have physical disease and illness excluded  
30  
31 310 or treated before or concurrently with their mental health needs and this can take time. Extended  
32  
33 311 waiting times may also reflect a lack of capacity to transfer patients to an appropriate mental health  
34  
35 312 care facility for timely treatment. Mean waiting times in the emergency department of 6-7 hours do not  
36  
37 313 suggest that mental and physical care are well integrated and may indicate that there are opportunities  
38  
39 314 to improve the quality of care and the experience for these patients.  
40  
41  
42  
43

44 315  
45  
46 316 Our study has several limitations which include the retrospective nature of the study. Diagnoses were  
47  
48 317 identified and confirmed from the electronic patient record and coding for patient episodes of care  
49  
50 318 which are open to a degree of error in recording and interpretation. This potential for error was partly  
51  
52 319 mitigated because acute mental health diagnoses were confirmed by a psychiatrist in the acute setting.  
53  
54

55 320  
56  
57  
58  
59  
60

1  
2  
3 321 **CONCLUSION**  
4  
5

6 322  
7

8 323 Patients present to acute general hospitals with both physical and mental health complaints. Our study  
9  
10 324 shows that while the covid-19 pandemic and the use of lockdowns may have had some impact on the  
11  
12 325 patterns and specific mental health diagnoses that were seen in our emergency departments, the  
13  
14  
15 326 mental health workload and need in acute general hospitals is longstanding. This has not been  
16  
17 327 substantially changed by the covid-19 pandemic.  
18

19 328  
20

21 329 Our study does show that several years later, considerable work is still needed to provide integrated  
22  
23 330 care which addresses the physical and mental healthcare needs of patients presenting to acute general  
24  
25  
26 331 hospitals. The recommendations of the National Confidential Enquiry into Postoperative Outcome and  
27  
28 332 Death 'Treat as One' remain as valid and important today as they were in 2017.[1]  
29

30 333  
31

32 334  
33

34 335  
35

36 336  
37

38 337  
39

40 338  
41

42 339  
43

44 340  
45

46 341  
47

48 342  
49

50 343  
51

52 344  
53  
54  
55  
56  
57  
58  
59  
60

1  
2  
3 345 **REFERENCES**  
4  
5

- 6 346 1. The National Confidential Enquiry into Patient Outcome and Death. 'Treat as One. Bridging the  
7  
8 347 gap between mental and physical healthcare in general hospitals'. [Internet]. 2017 [cited 12  
9  
10 348 October 2021].  
11  
12 349 [https://www.ncepod.org.uk/2017report1/downloads/TreatAsOne\\_FullReport.pdf](https://www.ncepod.org.uk/2017report1/downloads/TreatAsOne_FullReport.pdf)  
13  
14  
15 350 Last accessed 5 November 2021  
16  
17 351  
18  
19 352 2. Timeline of UK government coronavirus lockdowns [Internet]. The Institute for Government.  
20  
21 353 2021 [cited 13 October 2021]. Available from:  
22  
23 354 <https://www.instituteforgovernment.org.uk/charts/uk-government-coronavirus-lockdowns>  
24  
25 355 Last accessed 5 November 2021  
26  
27 356  
28  
29 357 3. Luykx J, Vinkers C, Tjink J. Psychiatry in Times of the Coronavirus Disease 2019 (COVID-19)  
30  
31 358 Pandemic. JAMA Psychiatry. 2020;77(11):1097.  
32  
33 359  
34  
35 360 4. Sheridan Rains L, Johnson S, Barnett P, et al. Early impacts of the COVID-19 pandemic on mental  
36  
37 361 health care and on people with mental health conditions: framework synthesis of international  
38  
39 362 experiences and responses. Social Psychiatry and Psychiatric Epidemiology. 2020;56(1):13-24.  
40  
41 363  
42  
43 364 5. Pierce M, Hope H, Ford T, et al. Mental health before and during the COVID-19 pandemic: a  
44  
45 365 longitudinal probability sample survey of the UK population. The Lancet Psychiatry.  
46  
47 366 2020;7(10):883-892.  
48  
49  
50  
51  
52  
53  
54  
55  
56  
57  
58  
59  
60

- 1  
2  
3 368 6. Jia R, Ayling K, Chalder T, et al. Mental health in the UK during the COVID-19 pandemic: cross-  
4  
5 369 sectional analyses from a community cohort study. BMJ Open. 2020;10(9):e040620.  
6  
7  
8 370  
9  
10 371

11  
12 372 **Contributorship statement**  
13  
14

15 373 All authors contributed to the study design. RA and JS conceived the study design. JC, RB and JB  
16  
17 374 collected and analysed the data. JB undertook the statistical analysis. JC, RB, JB and JS contributed to the  
18  
19 375 drafting and critical review of the manuscript. RA revised and edited the manuscript. All authors  
20  
21 376 approved the final draft. The corresponding author attests that all listed authors meet authorship  
22  
23 377 criteria and that no others meeting the criteria have been omitted. RA is the guarantor of this study.  
24  
25

26 378

27  
28 379 JC, RB and JB contributed equally to this study and are recognised as joint first authors.  
29  
30

31 380

32  
33 381 **Competing interests**  
34  
35

36 382 The authors have no competing interests to declare  
37  
38 383

39  
40 384 **Funding**  
41  
42

43 385 None  
44  
45 386

46  
47  
48 387 **DATA SHARING STATEMENT**  
49

50 388 Data are available upon reasonable request.  
51  
52 389  
53  
54  
55 390  
56  
57  
58  
59  
60



## 391 Ethical approval

392 This study involves human participants but an Ethics Committee(s) or Institutional Board(s) exempted  
393 this study. Data were anonymised before being accessed and used and analysed by the authors for this  
394 study.  
395

396

397

398

## 399 Figures and Legends

400

401

402

403 Figure 1 Mean number of presentations with acute mental health illness per week  
404 1 January 2018 - 30 June 2021

405

406

407 Figure 2 Patterns of diagnosis and presentation. Mean presentations per day during the covid-19  
408 pandemic

409

410

411 Figure 3 Diagnosis patterns for acute mental health presentations  
412 1 January 2018-30 June 2021

413

414

415 Figure 4a Diagnosis for acute mental health presentations 1 January 2018 – 30 June 2021.  
416 Raw number of admissions over each time period.

417

418 Figure 4b Diagnosis for acute mental health presentations 1 January 2018 - 30 June 2021.  
419 Numbers expressed as a percentage of overall admissions for each time period.

420

421

422 Figure 5 Waiting time in the emergency department for patients attending with acute mental  
423 health presentations 1 January 2018 – 30 June 2021.

424

425



Figure 1 Mean number of presentations with acute mental health illness per week 1 January 2018 - 30 June 2021

view only

Figure 2 Patterns of diagnosis and presentation. Mean presentations per day during the covid-19 pandemic

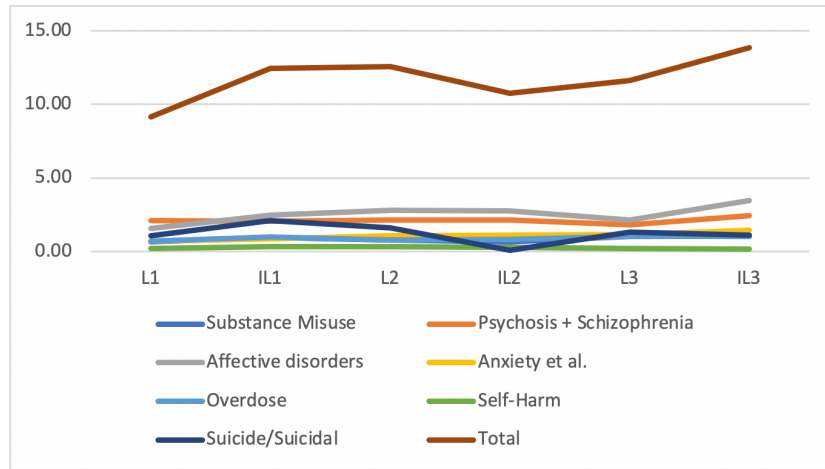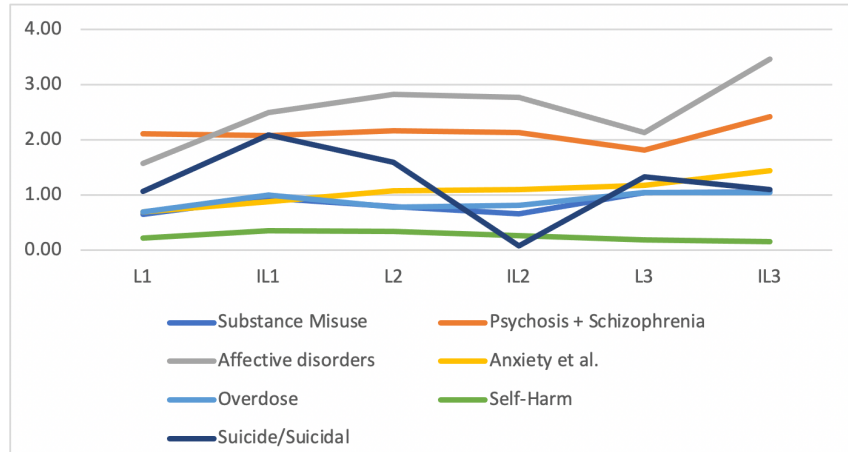

For peer review only

Figure 3 Patterns of diagnosis and presentation. Mean presentations per day during the matched time periods (MTP)

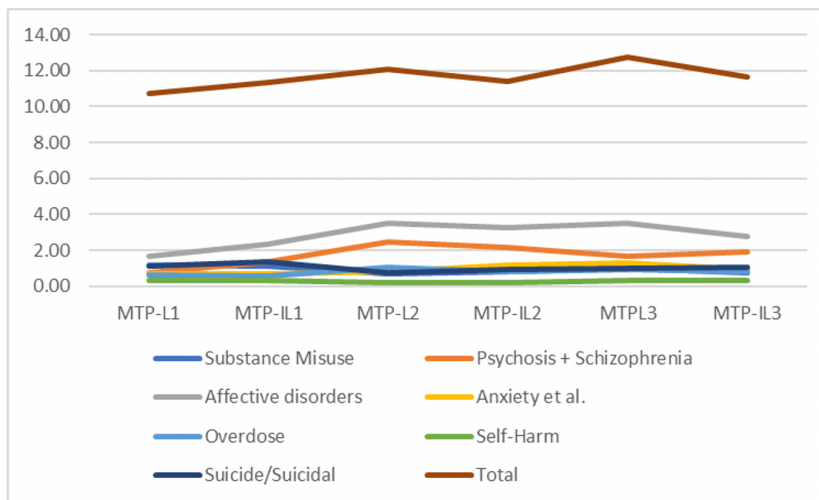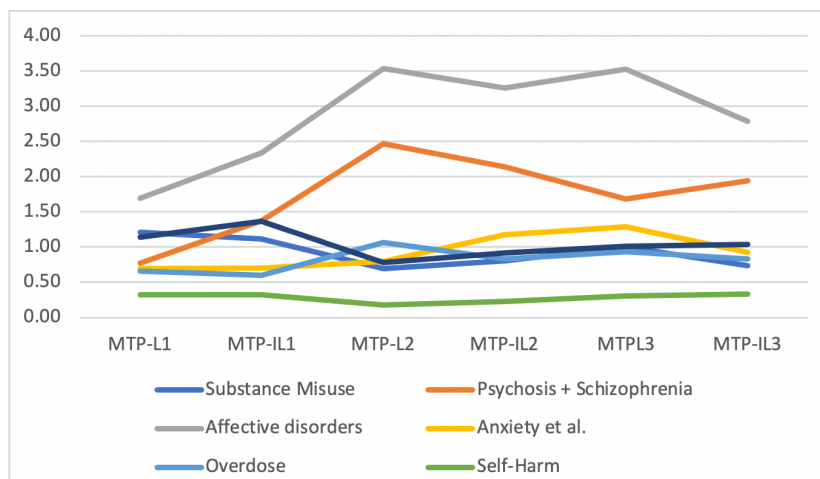

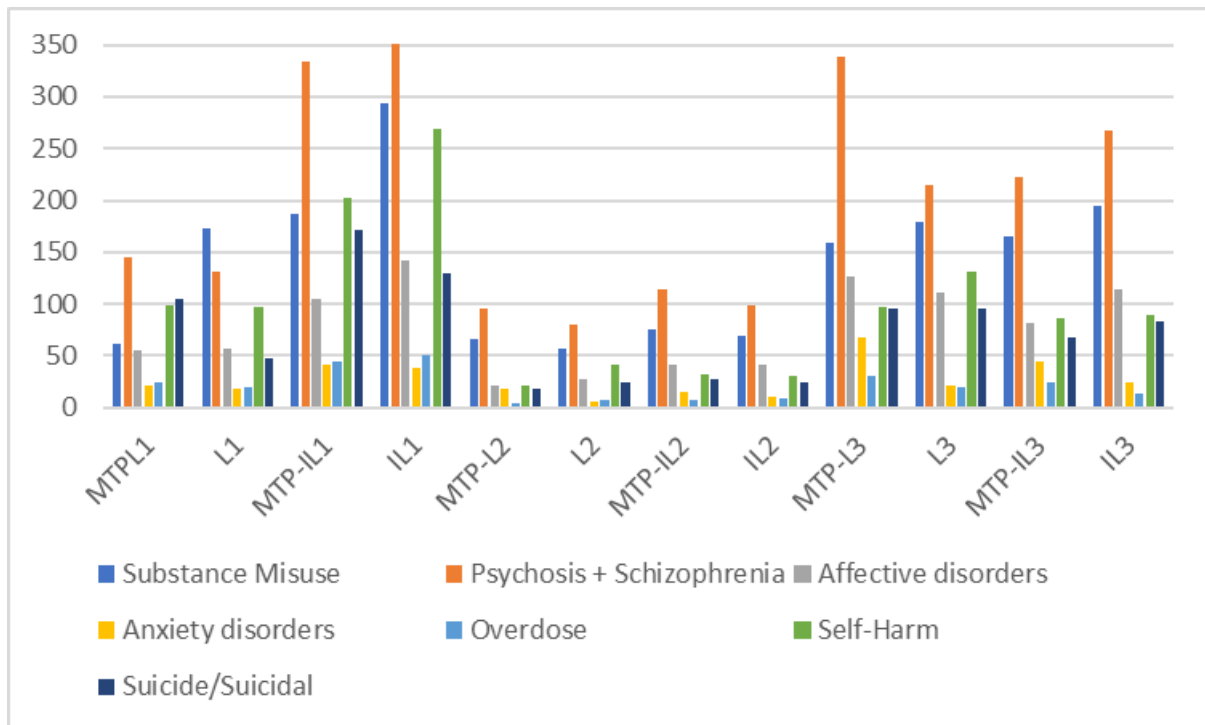

Figure 4a Diagnosis patterns for acute mental health presentations 1 January 2018-30 June 2021.

Raw number of admissions over each time period.

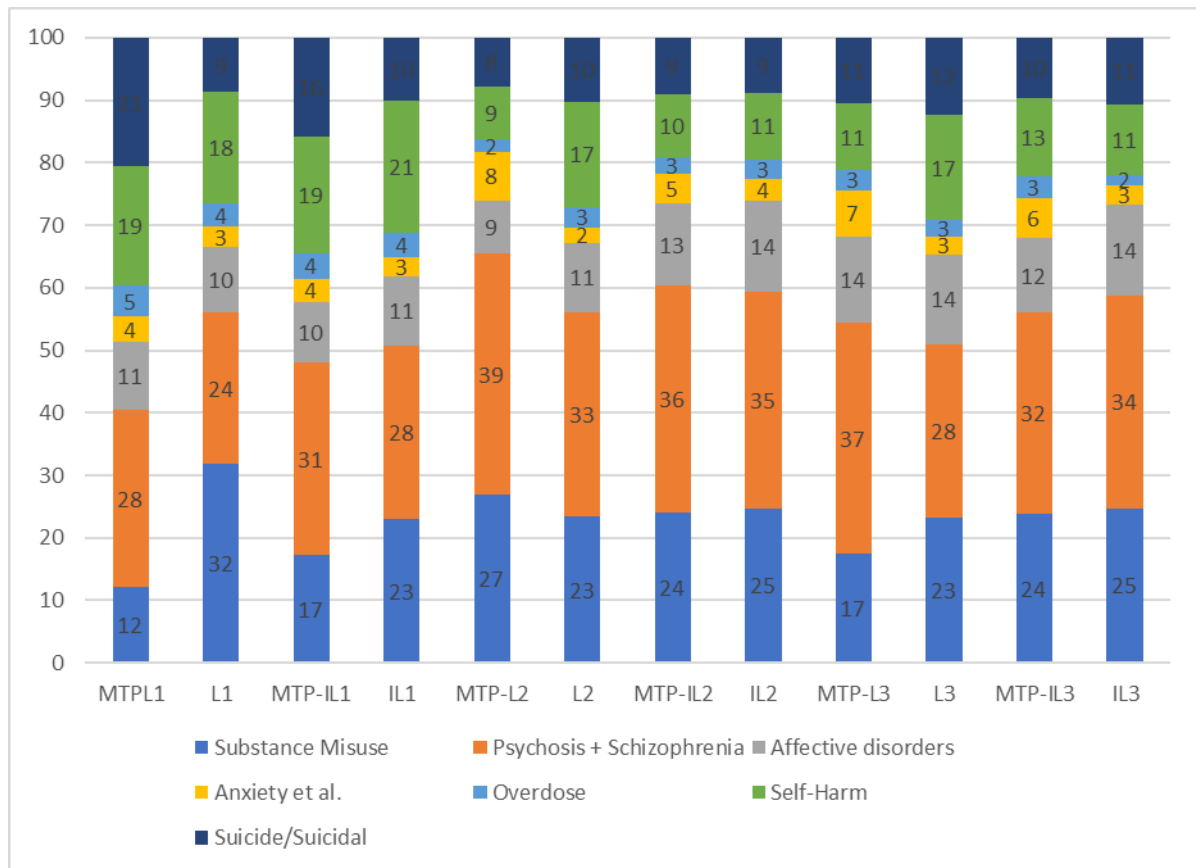

Figure 4b Diagnosis patterns for acute mental health presentations 1 January 2018-30 June 2021.

Each diagnosis as a percentage of overall admissions over each time period.

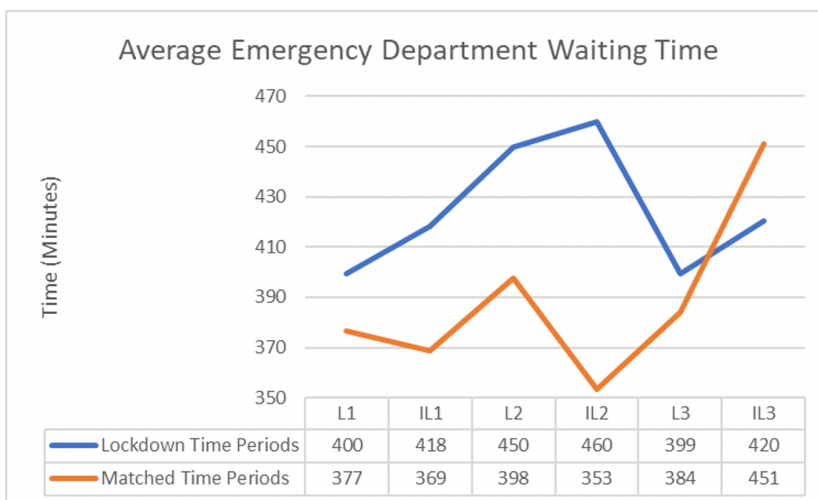

**Figure 5** Waiting time in the emergency department for patients attending with acute mental health presentations 1 January 2018 – 30 June 2021

Align to Right

review only

**The RECORD statement – checklist of items, extended from the STROBE statement, that should be reported in observational studies using routinely collected health data.**

|                      | Item No. | STROBE items                                                                                                                                                                               | Location in manuscript where items are reported | RECORD items                                                                                                                                                                                                                                                                                                                                                                                                                                | Location in manuscript where items are reported                         |
|----------------------|----------|--------------------------------------------------------------------------------------------------------------------------------------------------------------------------------------------|-------------------------------------------------|---------------------------------------------------------------------------------------------------------------------------------------------------------------------------------------------------------------------------------------------------------------------------------------------------------------------------------------------------------------------------------------------------------------------------------------------|-------------------------------------------------------------------------|
|                      | 1        | (a) Indicate the study's design with a commonly used term in the title or the abstract (b) Provide in the abstract an informative and balanced summary of what was done and what was found | Title Line 1<br>Abstract Line 49                | RECORD 1.1: The type of data used should be specified in the title or abstract. When possible, the name of the databases used should be included.<br><br>RECORD 1.2: If applicable, the geographic region and timeframe within which the study took place should be reported in the title or abstract.<br><br>RECORD 1.3: If linkage between databases was conducted for the study, this should be clearly stated in the title or abstract. | Methods Lines 143-145<br><br>Abstract Lines 51-54<br><br>Not applicable |
| <b>Introduction</b>  |          |                                                                                                                                                                                            |                                                 |                                                                                                                                                                                                                                                                                                                                                                                                                                             |                                                                         |
| Background rationale | 2        | Explain the scientific background and rationale for the investigation being reported                                                                                                       | Introduction Lines 92-125                       |                                                                                                                                                                                                                                                                                                                                                                                                                                             |                                                                         |
| Objectives           | 3        | State specific objectives, including any prespecified hypotheses                                                                                                                           | Introduction Lines 92-125                       |                                                                                                                                                                                                                                                                                                                                                                                                                                             |                                                                         |
| <b>Methods</b>       |          |                                                                                                                                                                                            |                                                 |                                                                                                                                                                                                                                                                                                                                                                                                                                             |                                                                         |
| Study Design         | 4        | Present key elements of study design early in the paper                                                                                                                                    | Methods Lines 140-162                           |                                                                                                                                                                                                                                                                                                                                                                                                                                             |                                                                         |
| Setting              | 5        | Describe the setting, locations, and relevant dates, including periods of recruitment, exposure, follow-up, and data collection                                                            | Abstract Lines 51-54<br>Methods Lines 140-162   |                                                                                                                                                                                                                                                                                                                                                                                                                                             |                                                                         |



|                              |   |                                                                                                                                                                                                                                                                                                                                                                                                                                                                                                                                                                                                                                                                                                                              |                                                                                                               |                                                                                                                                                                                                                                                                                                                                                                                                                                                                                                                                                                                                                                                                                                      |                                                                                       |
|------------------------------|---|------------------------------------------------------------------------------------------------------------------------------------------------------------------------------------------------------------------------------------------------------------------------------------------------------------------------------------------------------------------------------------------------------------------------------------------------------------------------------------------------------------------------------------------------------------------------------------------------------------------------------------------------------------------------------------------------------------------------------|---------------------------------------------------------------------------------------------------------------|------------------------------------------------------------------------------------------------------------------------------------------------------------------------------------------------------------------------------------------------------------------------------------------------------------------------------------------------------------------------------------------------------------------------------------------------------------------------------------------------------------------------------------------------------------------------------------------------------------------------------------------------------------------------------------------------------|---------------------------------------------------------------------------------------|
| Participants                 | 6 | <p>(a) <i>Cohort study</i> - Give the eligibility criteria, and the sources and methods of selection of participants. Describe methods of follow-up</p> <p><i>Case-control study</i> - Give the eligibility criteria, and the sources and methods of case ascertainment and control selection. Give the rationale for the choice of cases and controls</p> <p><i>Cross-sectional study</i> - Give the eligibility criteria, and the sources and methods of selection of participants</p> <p>(b) <i>Cohort study</i> - For matched studies, give matching criteria and number of exposed and unexposed</p> <p><i>Case-control study</i> - For matched studies, give matching criteria and the number of controls per case</p> | <p>Methods/Patients<br/>Lines 164-169</p> <p>Methods Matched<br/>time periods<br/>described lines 159-162</p> | <p>RECORD 6.1: The methods of study population selection (such as codes or algorithms used to identify subjects) should be listed in detail. If this is not possible, an explanation should be provided.</p> <p>RECORD 6.2: Any validation studies of the codes or algorithms used to select the population should be referenced. If validation was conducted for this study and not published elsewhere, detailed methods and results should be provided.</p> <p>RECORD 6.3: If the study involved linkage of databases, consider use of a flow diagram or other graphical display to demonstrate the data linkage process, including the number of individuals with linked data at each stage.</p> | <p>Methods/Patients<br/>Lines 164-169</p> <p>Not applicable</p> <p>Not applicable</p> |
| Variables                    | 7 | Clearly define all outcomes, exposures, predictors, potential confounders, and effect modifiers. Give diagnostic criteria, if applicable.                                                                                                                                                                                                                                                                                                                                                                                                                                                                                                                                                                                    | Methods/Patients studied outcomes recorded Lines 165-170                                                      | RECORD 7.1: A complete list of codes and algorithms used to classify exposures, outcomes, confounders, and effect modifiers should be provided. If these cannot be reported, an explanation should be provided.                                                                                                                                                                                                                                                                                                                                                                                                                                                                                      | Not applicable                                                                        |
| Data sources/<br>measurement | 8 | For each variable of interest, give sources of data and details of methods of assessment (measurement). Describe comparability of assessment methods if there is more than one group                                                                                                                                                                                                                                                                                                                                                                                                                                                                                                                                         | Methods/Patients<br>Lines 165-170<br>Lines 140-145                                                            |                                                                                                                                                                                                                                                                                                                                                                                                                                                                                                                                                                                                                                                                                                      |                                                                                       |

|                                                                                                                                                    |                                  |    |                                                                                                                                                                                                                                                                                                                                                                                                                                                                                                                                                                      |                                                                                                       |                                     |
|----------------------------------------------------------------------------------------------------------------------------------------------------|----------------------------------|----|----------------------------------------------------------------------------------------------------------------------------------------------------------------------------------------------------------------------------------------------------------------------------------------------------------------------------------------------------------------------------------------------------------------------------------------------------------------------------------------------------------------------------------------------------------------------|-------------------------------------------------------------------------------------------------------|-------------------------------------|
| 1<br>2<br>3<br>4<br>5<br>6                                                                                                                         | Bias                             | 9  | Describe any efforts to address potential sources of bias                                                                                                                                                                                                                                                                                                                                                                                                                                                                                                            | The use of HES data which is nationally collected and validated lines 140-145 and lines 165-170       |                                     |
| 7<br>8<br>9                                                                                                                                        | Study size                       | 10 | Explain how the study size was arrived at                                                                                                                                                                                                                                                                                                                                                                                                                                                                                                                            | Methods Lines 140-145                                                                                 |                                     |
| 10<br>11<br>12<br>13<br>14                                                                                                                         | Quantitative variables           | 11 | Explain how quantitative variables were handled in the analyses. If applicable, describe which groupings were chosen, and why                                                                                                                                                                                                                                                                                                                                                                                                                                        | Methods/Statistical analysis Lines 171-174                                                            |                                     |
| 15<br>16<br>17<br>18<br>19<br>20<br>21<br>22<br>23<br>24<br>25<br>26<br>27<br>28<br>29<br>30<br>31<br>32<br>33<br>34<br>35<br>36<br>37<br>38<br>39 | Statistical methods              | 12 | (a) Describe all statistical methods, including those used to control for confounding<br>(b) Describe any methods used to examine subgroups and interactions<br>(c) Explain how missing data were addressed<br>(d) <i>Cohort study</i> - If applicable, explain how loss to follow-up was addressed<br><i>Case-control study</i> - If applicable, explain how matching of cases and controls was addressed<br><i>Cross-sectional study</i> - If applicable, describe analytical methods taking account of sampling strategy<br>(e) Describe any sensitivity analyses | Methods/Statistical analysis Lines 171-174<br><br>Not applicable                                      |                                     |
| 40<br>41<br>42<br>43<br>44                                                                                                                         | Data access and cleaning methods |    | ..                                                                                                                                                                                                                                                                                                                                                                                                                                                                                                                                                                   | RECORD 12.1: Authors should describe the extent to which the investigators had access to the database | Not applicable<br><br>12.1 and 12.2 |

|                  |    |                                                                                                                                                                                                                                                                                                                                                 |                                                                                                                 |                                                                                                                                                                                                                                                                                                                    |                       |
|------------------|----|-------------------------------------------------------------------------------------------------------------------------------------------------------------------------------------------------------------------------------------------------------------------------------------------------------------------------------------------------|-----------------------------------------------------------------------------------------------------------------|--------------------------------------------------------------------------------------------------------------------------------------------------------------------------------------------------------------------------------------------------------------------------------------------------------------------|-----------------------|
|                  |    |                                                                                                                                                                                                                                                                                                                                                 |                                                                                                                 | population used to create the study population.<br><br>RECORD 12.2: Authors should provide information on the data cleaning methods used in the study.                                                                                                                                                             |                       |
| Linkage          |    | ..                                                                                                                                                                                                                                                                                                                                              |                                                                                                                 | RECORD 12.3: State whether the study included person-level, institutional-level, or other data linkage across two or more databases. The methods of linkage and methods of linkage quality evaluation should be provided.                                                                                          | Not applicable        |
| <b>Results</b>   |    |                                                                                                                                                                                                                                                                                                                                                 |                                                                                                                 |                                                                                                                                                                                                                                                                                                                    |                       |
| Participants     | 13 | (a) Report the numbers of individuals at each stage of the study ( <i>e.g.</i> , numbers potentially eligible, examined for eligibility, confirmed eligible, included in the study, completing follow-up, and analysed)<br>(b) Give reasons for non-participation at each stage.<br>(c) Consider use of a flow diagram                          | Methods All patients selected Lines 140-169                                                                     | RECORD 13.1: Describe in detail the selection of the persons included in the study ( <i>i.e.</i> , study population selection) including filtering based on data quality, data availability and linkage. The selection of included persons can be described in the text and/or by means of the study flow diagram. | Methods Lines 140-169 |
| Descriptive data | 14 | (a) Give characteristics of study participants ( <i>e.g.</i> , demographic, clinical, social) and information on exposures and potential confounders<br>(b) Indicate the number of participants with missing data for each variable of interest<br>(c) <i>Cohort study</i> - summarise follow-up time ( <i>e.g.</i> , average and total amount) | Results lines 186-243<br><br>Not applicable<br><br>Study period defined lines<br>Methods/Patients Lines 165-170 |                                                                                                                                                                                                                                                                                                                    |                       |

|                                                                                              |                |    |                                                                                                                                                                                                                                                                                                                                                                                                                                |                                                |                                                                                                                                                                                                                                                       |                                                |
|----------------------------------------------------------------------------------------------|----------------|----|--------------------------------------------------------------------------------------------------------------------------------------------------------------------------------------------------------------------------------------------------------------------------------------------------------------------------------------------------------------------------------------------------------------------------------|------------------------------------------------|-------------------------------------------------------------------------------------------------------------------------------------------------------------------------------------------------------------------------------------------------------|------------------------------------------------|
| 1<br>2<br>3<br>4<br>5<br>6<br>7<br>8<br>9<br>10<br>11                                        | Outcome data   | 15 | <p><i>Cohort study</i> - Report numbers of outcome events or summary measures over time</p> <p><i>Case-control study</i> - Report numbers in each exposure category, or summary measures of exposure</p> <p><i>Cross-sectional study</i> - Report numbers of outcome events or summary measures</p>                                                                                                                            | Results lines 186-243                          |                                                                                                                                                                                                                                                       |                                                |
| 12<br>13<br>14<br>15<br>16<br>17<br>18<br>19<br>20<br>21<br>22<br>23<br>24<br>25<br>26<br>27 | Main results   | 16 | <p>(a) Give unadjusted estimates and, if applicable, confounder-adjusted estimates and their precision (e.g., 95% confidence interval). Make clear which confounders were adjusted for and why they were included</p> <p>(b) Report category boundaries when continuous variables were categorized</p> <p>(c) If relevant, consider translating estimates of relative risk into absolute risk for a meaningful time period</p> | Results lines 186-243                          |                                                                                                                                                                                                                                                       |                                                |
| 28<br>29<br>30<br>31<br>32                                                                   | Other analyses | 17 | Report other analyses done— e.g., analyses of subgroups and interactions, and sensitivity analyses                                                                                                                                                                                                                                                                                                                             | Statistical analysis lines 172-175             |                                                                                                                                                                                                                                                       |                                                |
| <b>Discussion</b>                                                                            |                |    |                                                                                                                                                                                                                                                                                                                                                                                                                                |                                                |                                                                                                                                                                                                                                                       |                                                |
| 34<br>35                                                                                     | Key results    | 18 | Summarise key results with reference to study objectives                                                                                                                                                                                                                                                                                                                                                                       |                                                |                                                                                                                                                                                                                                                       |                                                |
| 36<br>37<br>38<br>39<br>40<br>41<br>42<br>43<br>44                                           | Limitations    | 19 | Discuss limitations of the study, taking into account sources of potential bias or imprecision. Discuss both direction and magnitude of any potential bias                                                                                                                                                                                                                                                                     | Limitations and strengths of study lines 80-86 | RECORD 19.1: Discuss the implications of using data that were not created or collected to answer the specific research question(s). Include discussion of misclassification bias, unmeasured confounding, missing data, and changing eligibility over | Limitations and strengths of study lines 80-86 |

|                                                                |                                                           |    |                                                                                                                                                                            |                                                                                                                                                          |                |
|----------------------------------------------------------------|-----------------------------------------------------------|----|----------------------------------------------------------------------------------------------------------------------------------------------------------------------------|----------------------------------------------------------------------------------------------------------------------------------------------------------|----------------|
|                                                                |                                                           |    |                                                                                                                                                                            | time, as they pertain to the study being reported.                                                                                                       |                |
| 1<br>2<br>3<br>4<br>5<br>6<br>7<br>8<br>9                      | Interpretation                                            | 20 | Give a cautious overall interpretation of results considering objectives, limitations, multiplicity of analyses, results from similar studies, and other relevant evidence | Discussion lines 251-288                                                                                                                                 |                |
| 10<br>11<br>12<br>13<br>14<br>15<br>16<br>17<br>18<br>19<br>20 | Generalisability                                          | 21 | Discuss the generalisability (external validity) of the study results                                                                                                      | Limitations and strengths of study lines 80-86<br><br>Generalisability and previous studies/NCEPOD report cited lines 275-280                            |                |
| 21                                                             | <b>Other Information</b>                                  |    |                                                                                                                                                                            |                                                                                                                                                          |                |
| 22<br>23<br>24<br>25<br>26<br>27                               | Funding                                                   | 22 | Give the source of funding and the role of the funders for the present study and, if applicable, for the original study on which the present article is based              | No funding<br><br>Funding statement Lines 357-358                                                                                                        |                |
| 28<br>29<br>30<br>31<br>32<br>33                               | Accessibility of protocol, raw data, and programming code |    | ..                                                                                                                                                                         | RECORD 22.1: Authors should provide information on how to access any supplemental information such as the study protocol, raw data, or programming code. | Not applicable |

\*Reference: Benchimol EI, Smeeth L, Guttman A, Harron K, Moher D, Petersen I, Sørensen HT, von Elm E, Langan SM, the RECORD Working Committee. The REporting of studies Conducted using Observational Routinely-collected health Data (RECORD) Statement. *PLoS Medicine* 2015; in press.

\*Checklist is protected under Creative Commons Attribution ([CC BY](https://creativecommons.org/licenses/by/4.0/)) license.
